# Supplementary material for: CD13 expression affects glioma patient survival and influences key functions of human glioblastoma cell lines in vitro
Source: Springer Nature journal article supplement (doi:10.1186/s12885-024-12113-z), 2024-03-22

# CD13 (160 kDa and 130 kDa)—Figure 4A

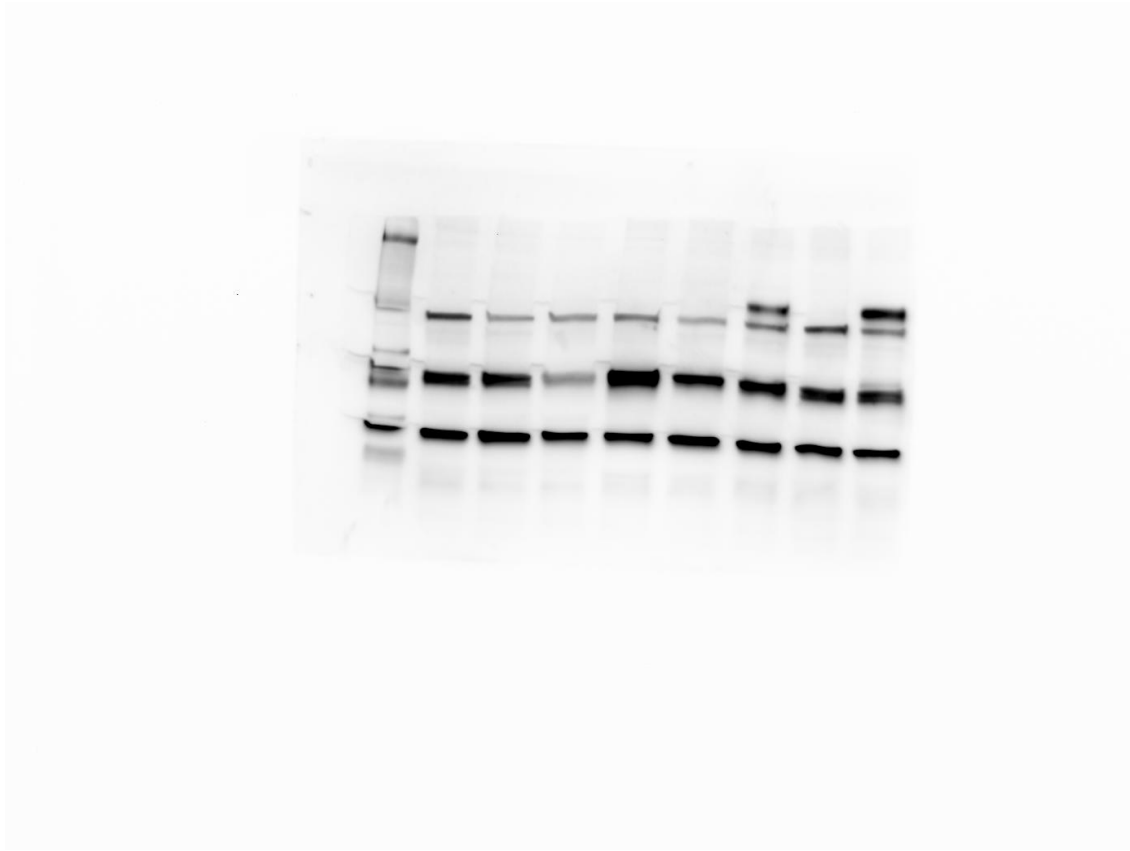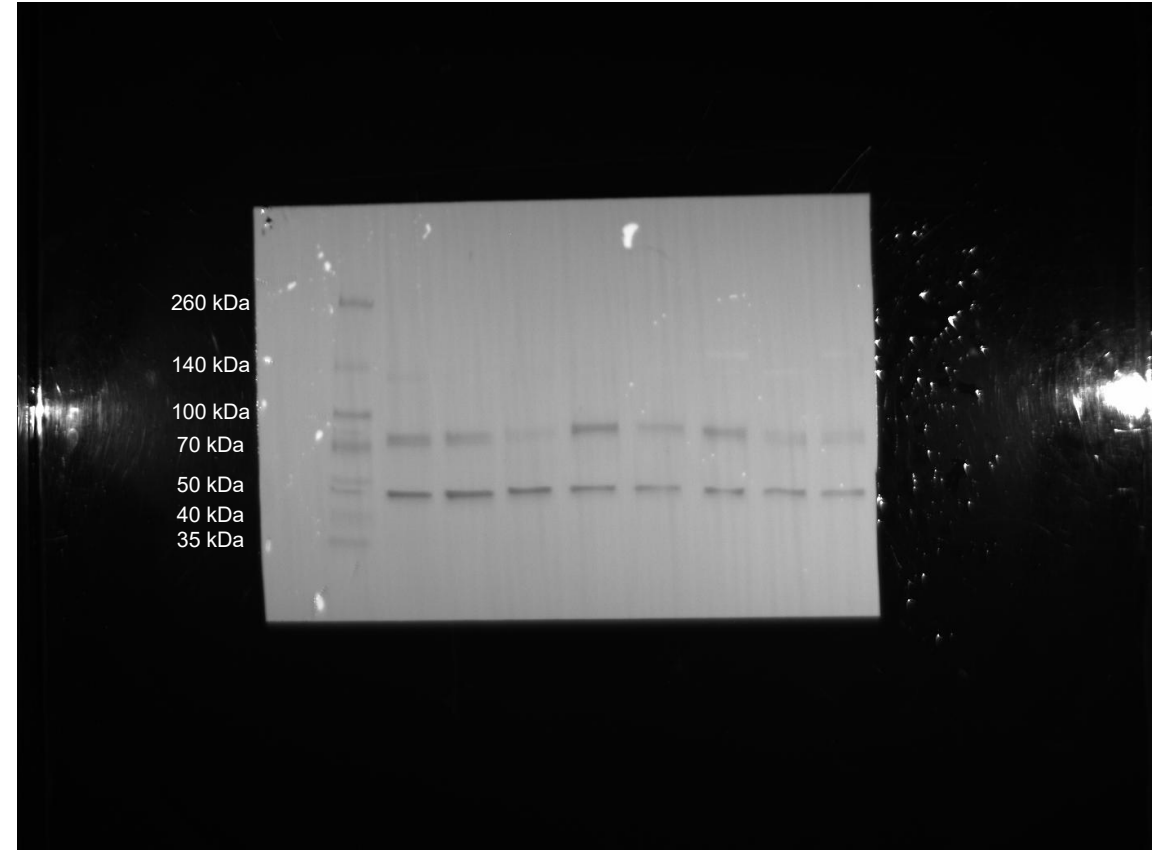

# GAPDH (37 kDa)—Figure 4A

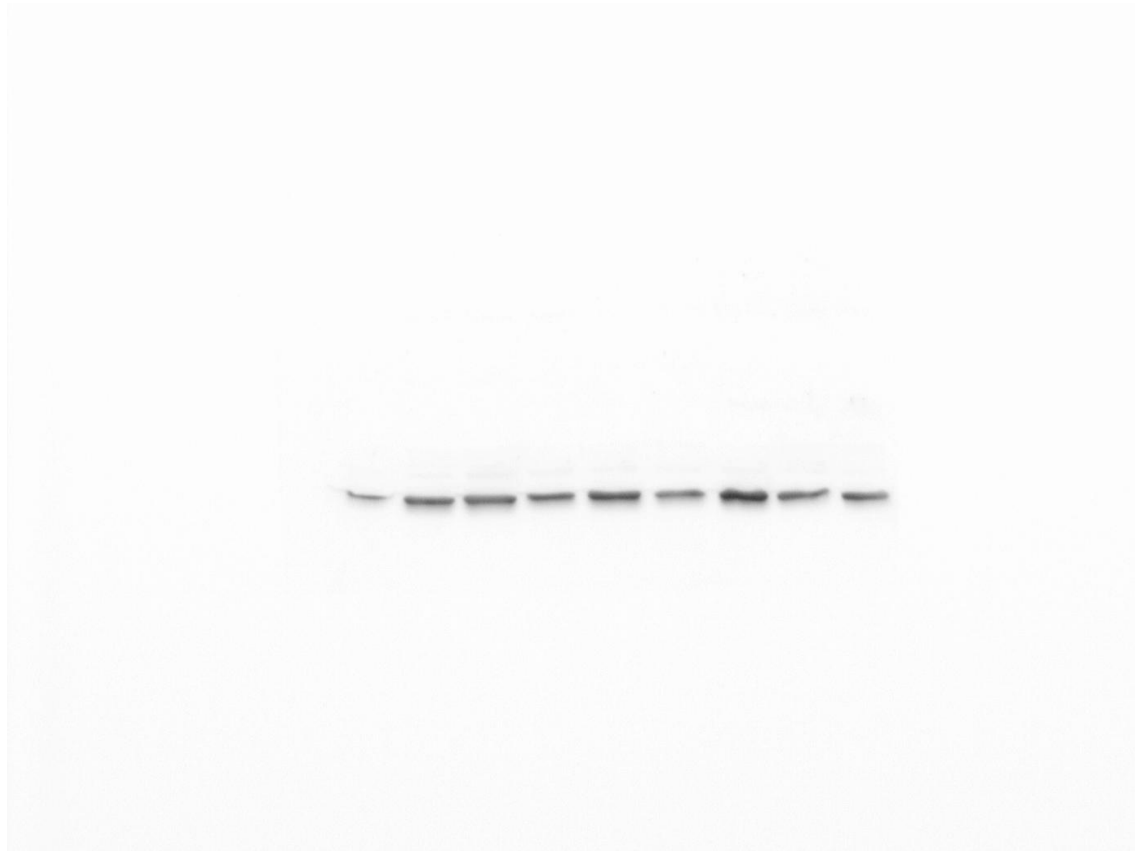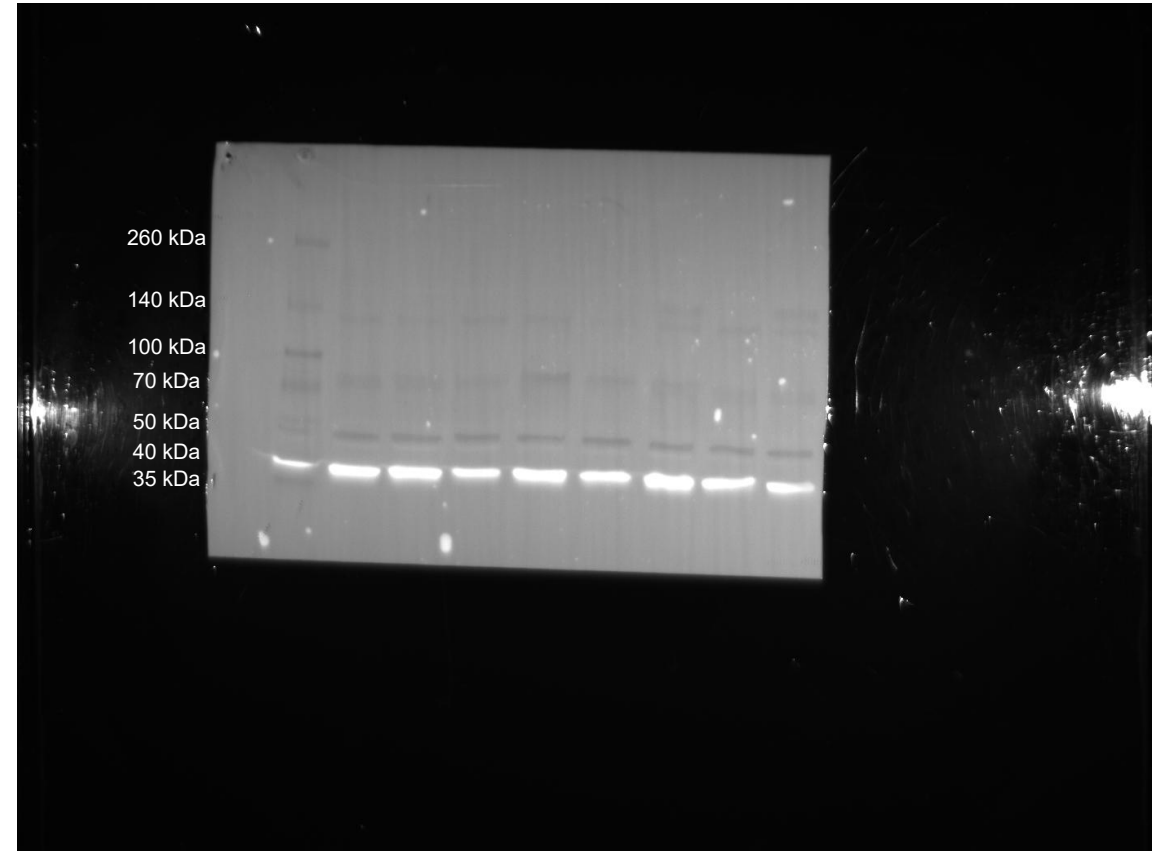

# BAX (20 kDa)—Supplementary Figure S1

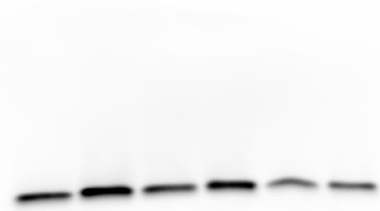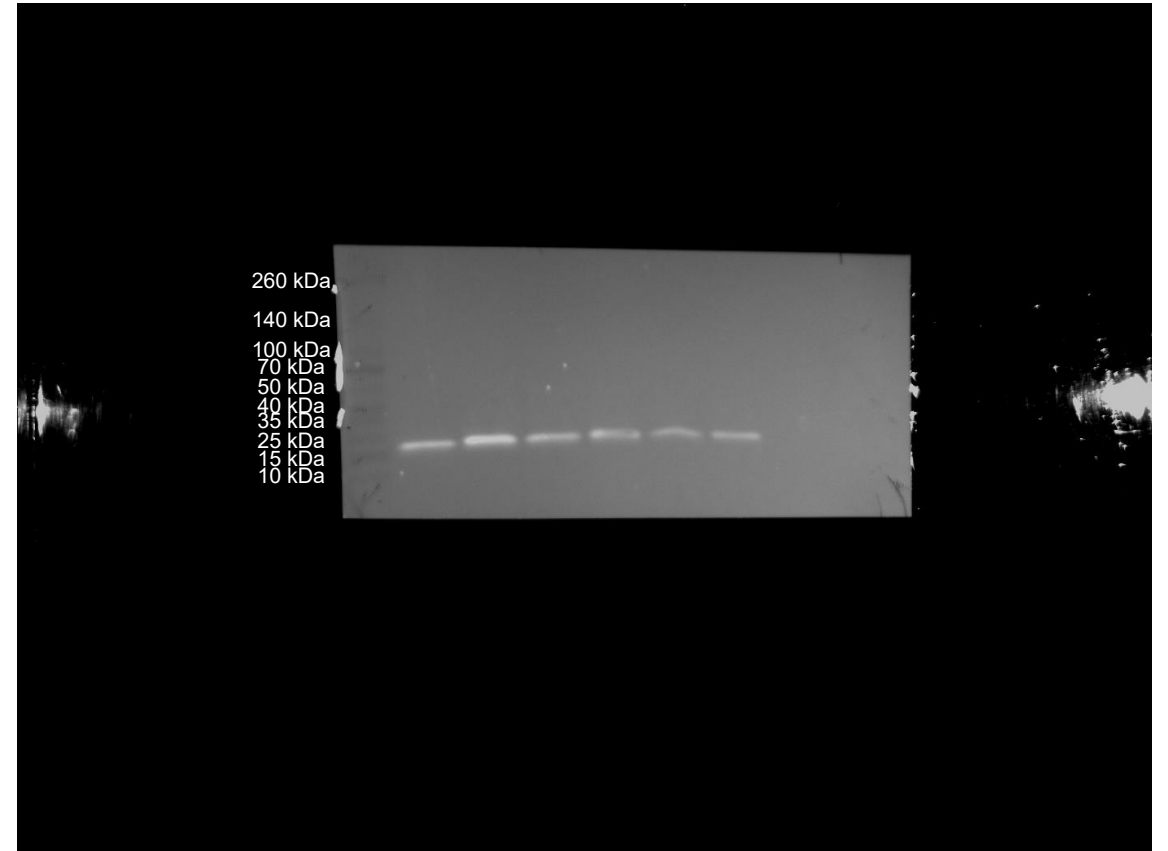

# NOXA (11 kDa)—Supplementary Figure S1

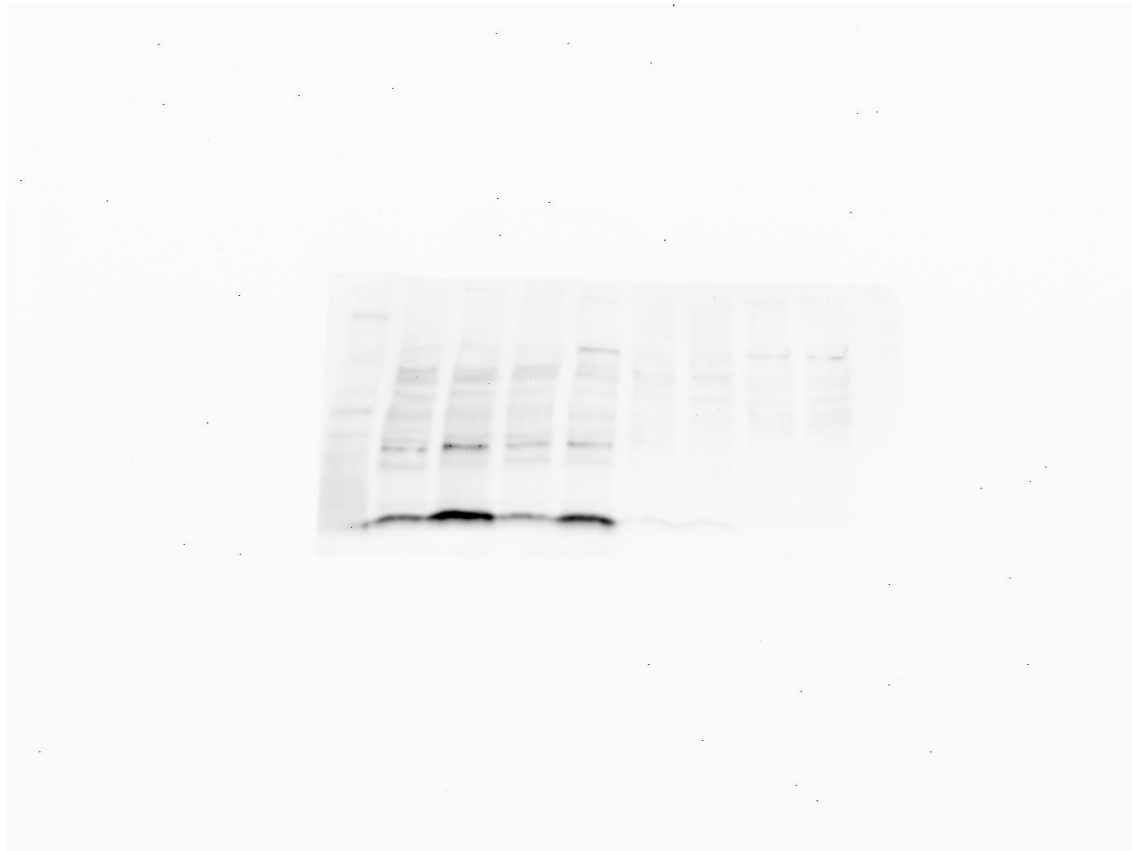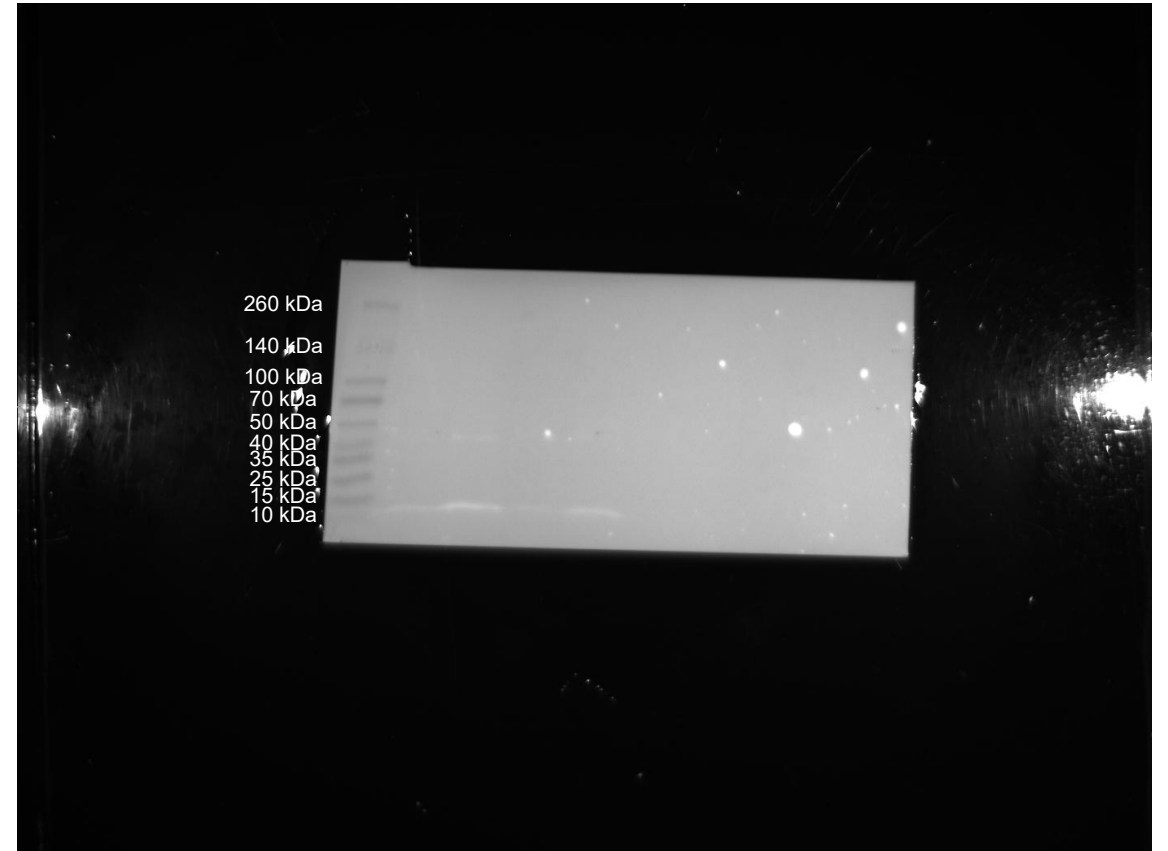

# BCL 2 (26 kDa)—Supplementary Figure S1

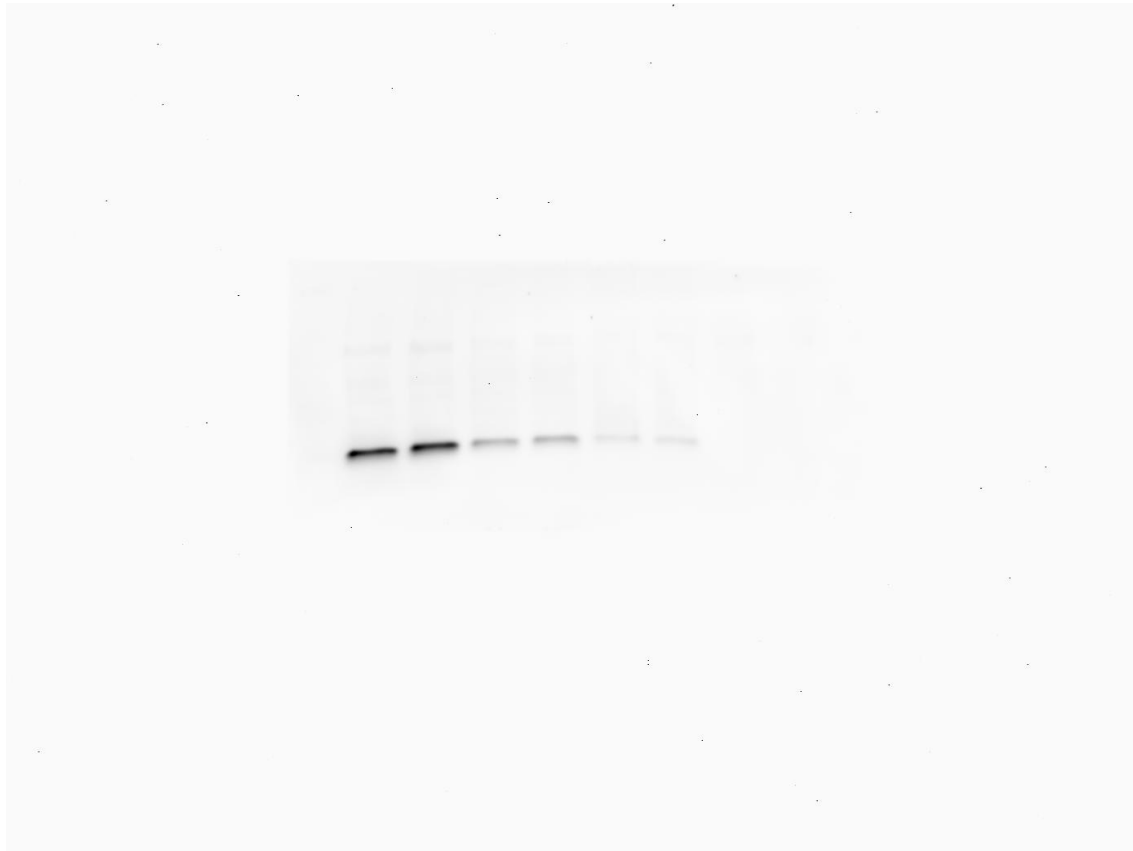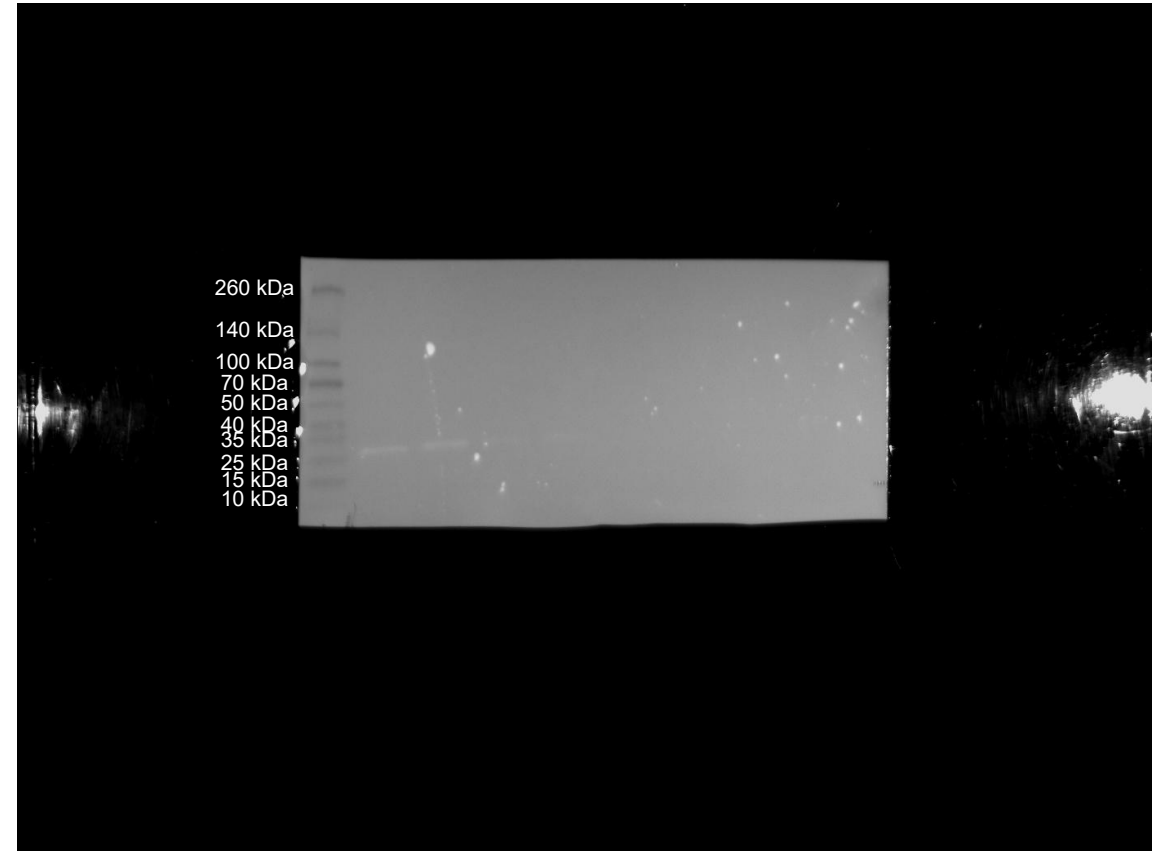

# Pro CAS-3 (35 kDa)—Supplementary Figure S1

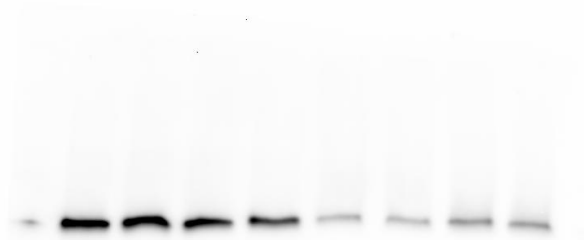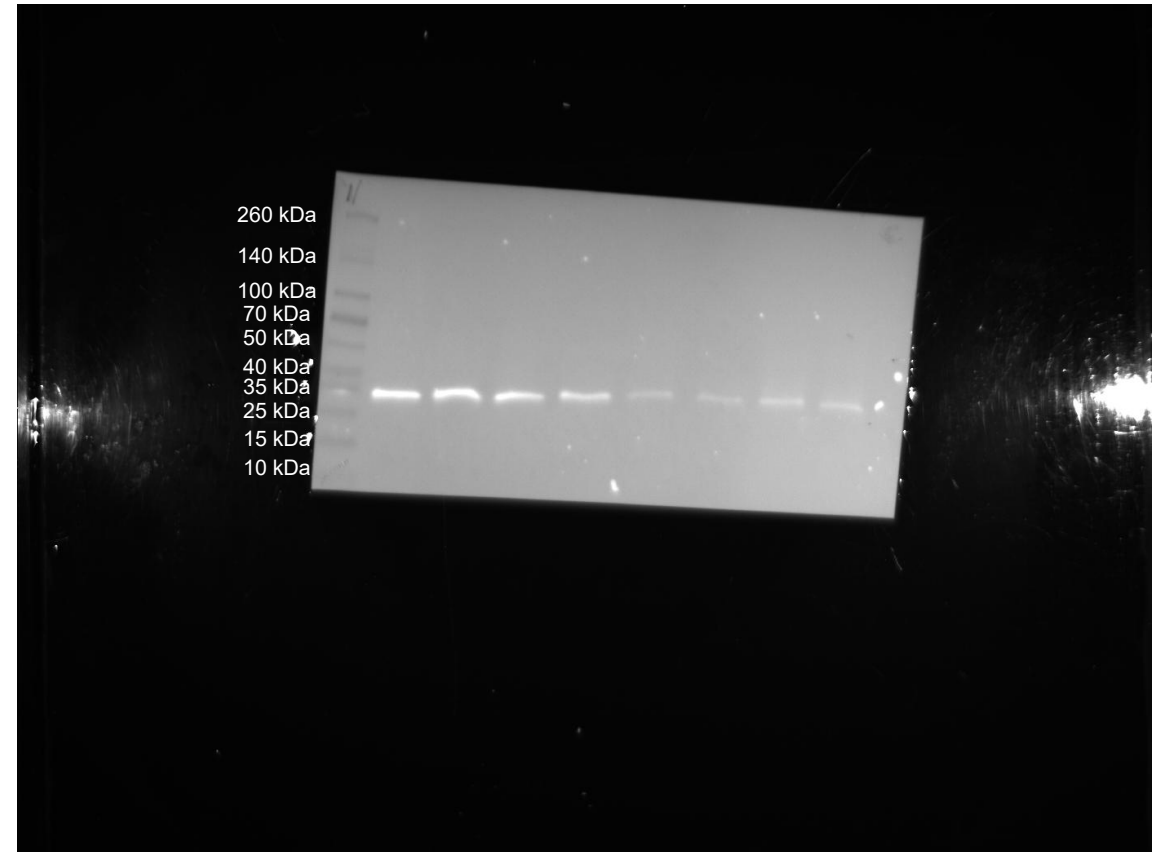

# Cleaved CAS-3 (19 kDa and 17 kDa)—Supplementary Figure S1

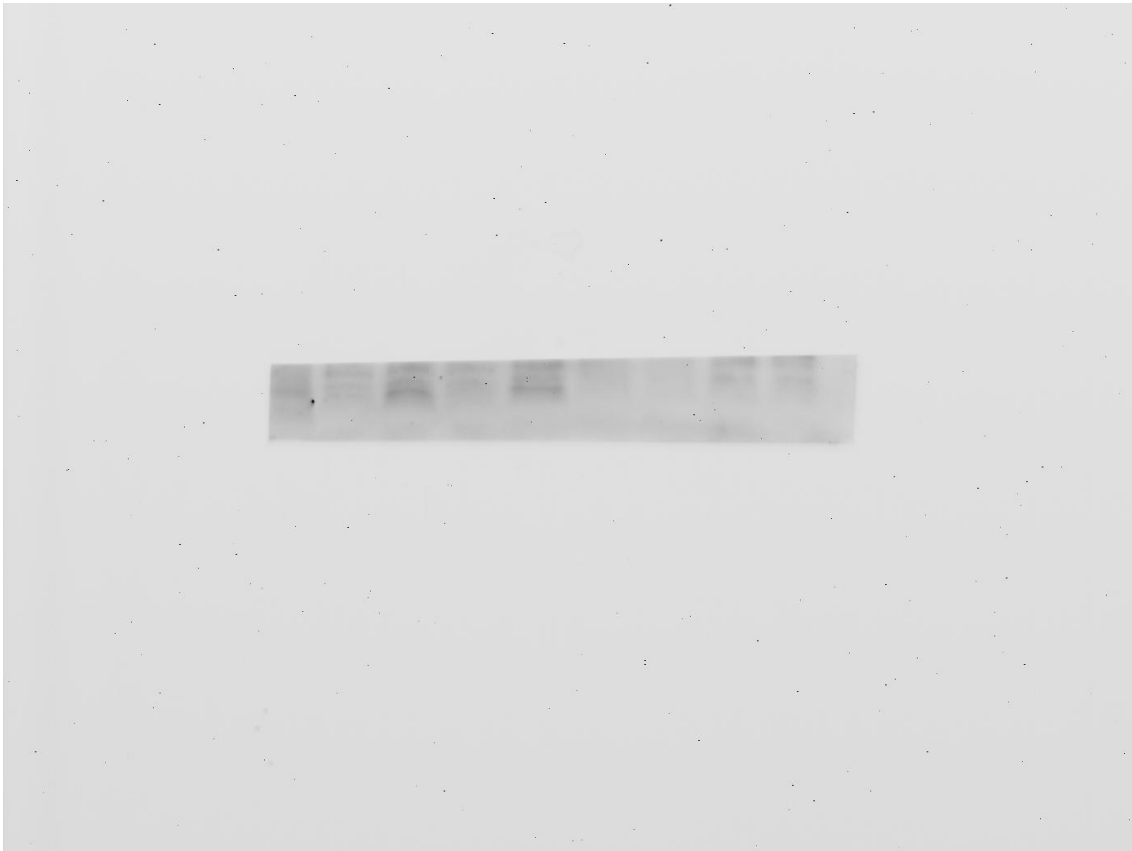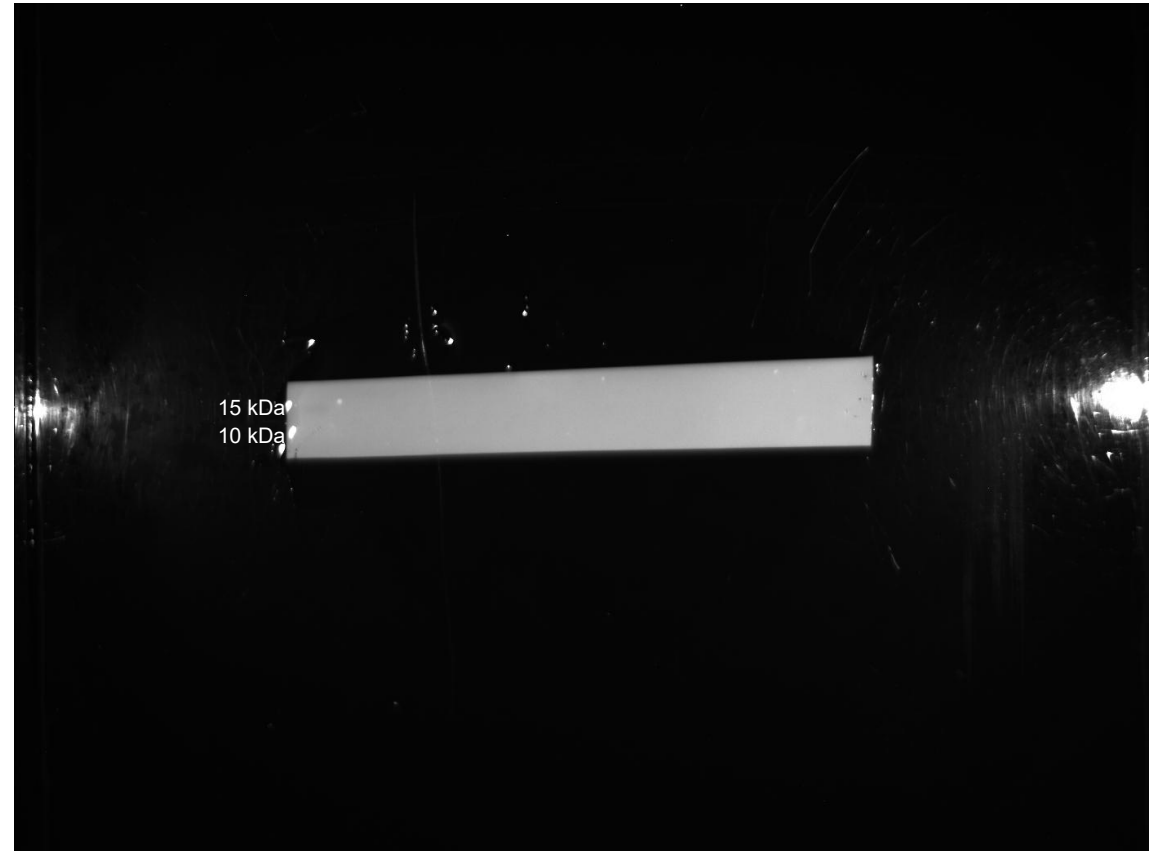

# GAPDH (37 kDa)—Supplementary Figure S1

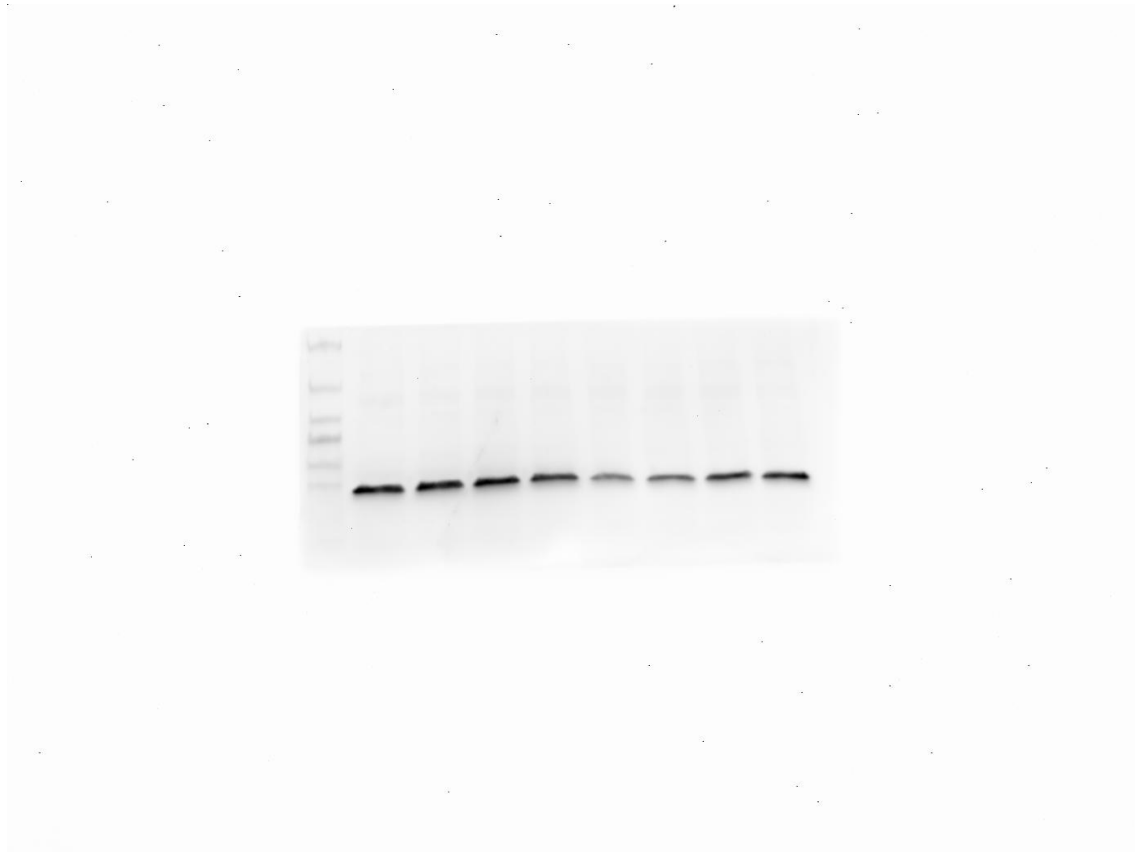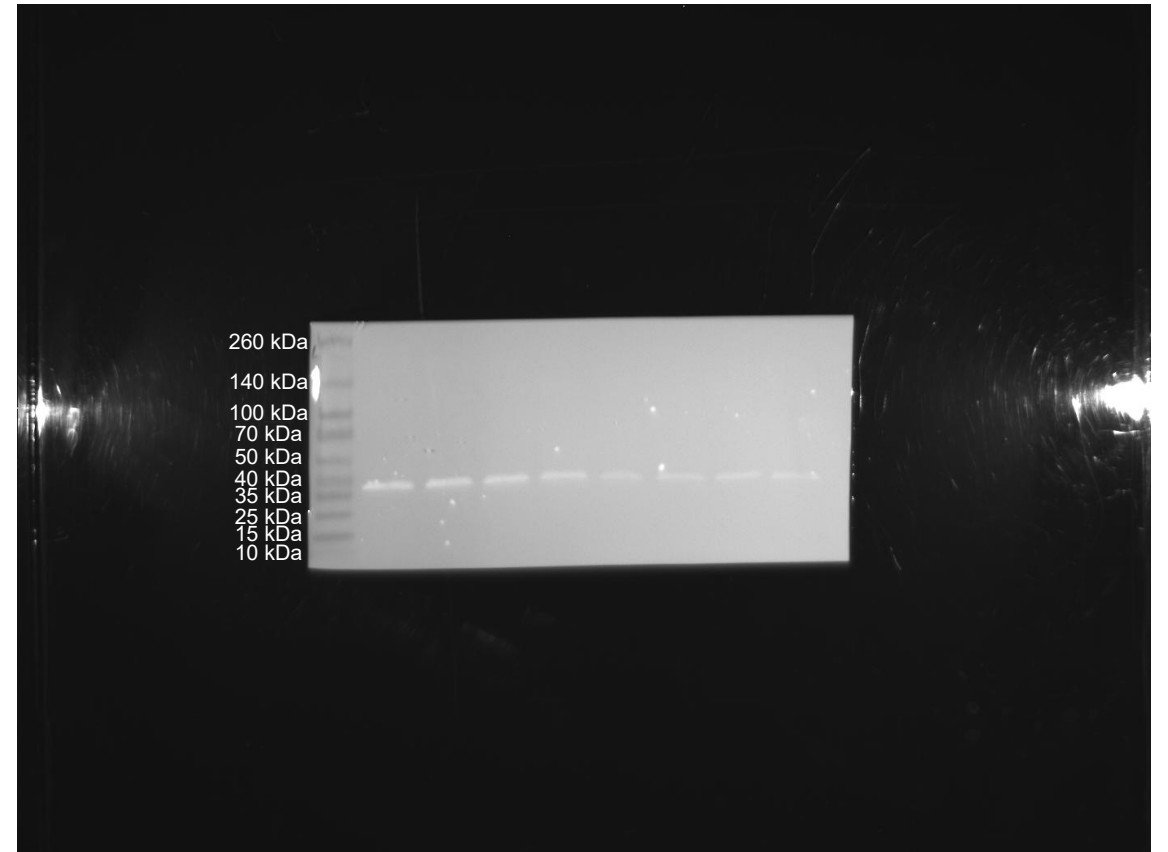

Supplement: MOESM7 [file 26898272]
