# Supplementary material for: CD13 expression affects glioma patient survival and influences key functions of human glioblastoma cell lines in vitro
Source: Springer Nature journal article supplement (doi:10.1186/s12885-024-12113-z), 2024-03-22
Supplement: MOESM1 [file 26898272]

**Supplementary Table 1. Characteristics of patients**

|                              | <b>Value</b>                 |
|------------------------------|------------------------------|
| <b>Age (mean ± SD)</b>       | <b>50.63 ± 15.97</b>         |
| GBM                          | 57.88 ± 18.20                |
| A°III                        | 39.75 ± 8.380                |
| EP                           | 47.00 ± 10.80                |
| <b>Gender (f/m)</b>          | <b>10/6</b>                  |
| GBM                          | 5/3                          |
| A°III                        | 3/1                          |
| EP                           | 2/2                          |
| <b>Localisation of tumor</b> | <b>GBM/A°III</b>             |
| frontal                      | 1/1                          |
| temporal                     | 3/2                          |
| occipital                    | 2/0                          |
| insula                       | 0/1                          |
| operculum                    | 2/0                          |
| <b>MGMT Status</b>           | <b>methyated/unmethyated</b> |
| GBM                          | 3/5                          |
| <b>IDH Status</b>            | <b>wildtype/mutant/na</b>    |
| GBM                          | 5/1/2                        |
| A°III                        | 1/2/1                        |
| <b>Recurrence</b>            | <b>primary/relapse</b>       |
| GBM                          | 6/2                          |

GBM, glioblastoma; A° III, anaplastic astrocytoma (WHO grade III); EP, epilepsy; f, female; m, male; MGMT, O-6-methylguanin-DNA-methyltransferase; IDH, isocitrate dehydrogenase; na, not assigned.
