# Supplementary material for: CD13 expression affects glioma patient survival and influences key functions of human glioblastoma cell lines in vitro
Source: Springer Nature journal article supplement (doi:10.1186/s12885-024-12113-z), 2024-03-22
Supplement: MOESM2 [file 26898272]

**Supplementary Table 2. Characteristics of human glioma cell lines**

| Cell line | Origin                   | Disease                   | Morphology   | Features                                                                                             | Reference                             |
|-----------|--------------------------|---------------------------|--------------|------------------------------------------------------------------------------------------------------|---------------------------------------|
| T98G      | Male,<br>61-year old     | Glioblastoma              | Fibroblast   | Karyotype:<br>hyperpentaploid<br>Doubling time: 24-28h                                               | Stein GH et al. <sup>1</sup>          |
| U87MG     | Male,<br>44-year old     | Glioblastoma              | Epithelial   | Karyotype: diploid<br>Doubling time: 18-38h<br>Grow in "tube-like"<br>structure in low FBS<br>medium | Allen M et al. <sup>2</sup>           |
| SF188     | Male,<br>8-year old      | Glioblastoma              | Epithelial   | Karyotype:<br>hypertriploid<br>Doubling time: 28h                                                    | Rutka JT et al. <sup>3</sup>          |
| SF767     | Female,<br>50 year old   | Recurrent<br>Glioblastoma |              | Doubling time: approx.<br>30h                                                                        | Maletínská L et al. <sup>4</sup>      |
| U373      | Male,<br>50 year old     | Glioblastoma              | Glial        | Karyotype: diploid<br>Doubling time: approx.<br>40h                                                  | Bigner DD et al. <sup>5</sup>         |
| U118      | Male,<br>47 -year<br>old | Astrocytoma               | Mixed        | Karyotype: pentaploid                                                                                | JAN PONTÉN et al. <sup>6</sup>        |
| SF126     | Female,<br>50 year old   | Glioblastoma              | Fibroblastic | Karyotype:<br>hypertriploid<br>Doubling time: 29h                                                    | Rutka JT et al. <sup>3</sup>          |
| U1242     | -                        | Glioblastoma              | Fibroblastic | -                                                                                                    | Bongcam-Rudloff E et al. <sup>7</sup> |

**References**

- Stein GH. (1979). T98G: an anchorage-independent human tumor cell line that exhibits stationary phase G1 arrest in vitro. *J Cell Physiol* 99, 43-54. 10.1002/jcp.1040990107.
- Allen M, Bjerke M, Edlund H, Nelander S, Westermark B. Origin of the U87MG glioma cell line: Good news and bad news. (2016). *Sci Transl Med* 8, 354re3. 10.1126/scitranslmed.aaf6853.
- Rutka JT, Giblin JR, Dougherty DY, Liu HC, McCulloch JR, Bell CW, Stern RS, Wilson CB, Rosenblum ML. (1987). Establishment and characterization of five cell lines derived from human malignant gliomas. *Acta Neuropathol* 75, 92-103. 10.1007/BF00686798.
- Mohapatra G, Kim DH, Feuerstein BG. Detection of multiple gains and losses of genetic material in ten glioma cell lines by comparative genomic hybridization. (1995). *Genes Chromosomes Cancer* 13, 86-93. 10.1002/gcc.2870130203.
- Bigner DD, Bigner SH, Pontén J, Westermark B, Mahaley MS, Ruoslahti E, Herschman H, Eng LF, Wikstrand CJ. Heterogeneity of Genotypic and phenotypic characteristics of fifteen permanent cell lines derived from human gliomas. (1981). *J Neuropathol Exp Neurol* 40, 201-29. 10.1097/00005072-198105000-00001.
- Pontén J, Macintyre EH. Long term culture of normal and neoplastic human glia. (1968). *Acta Pathol Microbiol Scand* 74, 465-86. 10.1111/j.1699-0463.1968.tb03502.x.
- Bongcam-Rudloff E, Nistér M, Betsholtz C, Wang JL, Stenman G, Huebner K, Croce CM, Westermark B. (1991). Human glial fibrillary acidic protein: complementary DNA cloning, chromosome localization, and messenger RNA expression in human glioma cell lines of various phenotypes. *Cancer Res* 51, 1553-60.
