# Supplementary material for: CD13 expression affects glioma patient survival and influences key functions of human glioblastoma cell lines in vitro
Source: Springer Nature journal article supplement (doi:10.1186/s12885-024-12113-z), 2024-03-22
Supplement: MOESM3 [file 26898272]

**Supplementary Table 3. Cell seeding numbers**

| Cell line | 8-well chamber<br>(Immunocytochemistry) | 96-well plate<br>(MTT assay) | Culture-Insert 24-well plate<br>(Cell scratch assay) |
|-----------|-----------------------------------------|------------------------------|------------------------------------------------------|
| U118      | 7000 cells/well                         | 6000 cells/well              | $3.5 \times 10^5$ cells/mL                           |
| U1242     | 3000 cells/well                         | 2000 cells/well              | $2.4 \times 10^5$ cells/mL                           |
| T98G      | 4000 cells/well                         | 3000 cells/well              | $3.5 \times 10^5$ cells/mL                           |
| SF188     | 1500 cells/well                         | 1800 cells/well              | $2.0 \times 10^5$ cells/mL                           |
