# Supplementary material for: CD13 expression affects glioma patient survival and influences key functions of human glioblastoma cell lines in vitro
Source: Springer Nature journal article supplement (doi:10.1186/s12885-024-12113-z), 2024-03-22
Supplement: MOESM4 [file 26898272]

**Supplementary Table 4. CD13 co-expressed genes**

| gene2      | cor   | pvalue   |
|------------|-------|----------|
| TNMD       | 0.389 | 1.02E-25 |
| CFH        | 0.405 | 6.76E-28 |
| FUCA2      | 0.32  | 1.92E-17 |
| TMEM176A   | 0.337 | 2.56E-19 |
| TFPI       | 0.323 | 8.62E-18 |
| PLXND1     | 0.44  | 2.96E-33 |
| SLC22A16   | 0.35  | 8.76E-21 |
| PRSS22     | 0.516 | 4.90E-47 |
| MEOX1      | 0.358 | 1.02E-21 |
| COPZ2      | 0.342 | 7.08E-20 |
| ITGA3      | 0.341 | 8.80E-20 |
| TNFRSF12A  | 0.301 | 1.45E-15 |
| BAIAP2L1   | 0.525 | 7.60E-49 |
| ALDH3B1    | 0.311 | 1.40E-16 |
| CCL26      | 0.683 | 1.26E-93 |
| TBXA2R     | 0.417 | 1.05E-29 |
| MYH13      | 0.361 | 4.19E-22 |
| TEAD3      | 0.316 | 4.44E-17 |
| ST3GAL1    | 0.419 | 6.81E-30 |
| UBE3C      | 0.37  | 3.52E-23 |
| STAB1      | 0.322 | 1.10E-17 |
| HFE        | 0.349 | 1.17E-20 |
| FM01       | 0.564 | 1.04E-57 |
| AC080038.1 | 0.367 | 6.65E-23 |
| TSPAN9     | 0.553 | 3.54E-55 |
| PLAUR      | 0.545 | 2.91E-53 |
| DCN        | 0.562 | 3.78E-57 |
| PRICKLE3   | 0.365 | 1.35E-22 |
| ALOX5      | 0.326 | 4.41E-18 |
| DNASE1L1   | 0.504 | 1.58E-44 |
| ACPP       | 0.461 | 1.07E-36 |
| MARCO      | 0.407 | 3.70E-28 |
| SNAI2      | 0.566 | 3.78E-58 |
| ADGRA2     | 0.454 | 2.11E-35 |
| SERPINB1   | 0.345 | 3.01E-20 |
| GLRX2      | 0.314 | 8.28E-17 |
| ABCC2      | 0.356 | 1.54E-21 |
| EHD2       | 0.381 | 1.35E-24 |
| INSRR      | 0.368 | 5.37E-23 |
| SH2D2A     | 0.57  | 3.75E-59 |
| BAK1       | 0.347 | 1.74E-20 |
| GRN        | 0.4   | 3.60E-27 |
| CHPF2      | 0.492 | 2.91E-42 |
| MAP2K3     | 0.362 | 3.32E-22 |
| TMSB10     | 0.388 | 1.34E-25 |
| MSR1       | 0.347 | 1.86E-20 |
| RAI14      | 0.311 | 1.57E-16 |
| AP2S1      | 0.333 | 7.56E-19 |
| EPHA3      | 0.311 | 1.43E-16 |

|          |       |           |
|----------|-------|-----------|
| HSPA5    | 0.418 | 9.58E-30  |
| H6PD     | 0.331 | 1.11E-18  |
| TNFRSF9  | 0.43  | 1.10E-31  |
| LTBP1    | 0.349 | 1.25E-20  |
| RCN1     | 0.322 | 1.12E-17  |
| HEXB     | 0.429 | 2.13E-31  |
| NFE2L3   | 0.341 | 1.04E-19  |
| LY75     | 0.304 | 7.39E-16  |
| DCBLD2   | 0.421 | 3.16E-30  |
| SOAT1    | 0.317 | 3.83E-17  |
| PRDM1    | 0.323 | 9.30E-18  |
| SEC61A1  | 0.323 | 9.39E-18  |
| SLC2A3   | 0.308 | 3.46E-16  |
| GNA15    | 0.361 | 3.81E-22  |
| LZTS1    | 0.339 | 1.54E-19  |
| CASP8    | 0.35  | 8.45E-21  |
| CTSA     | 0.344 | 4.22E-20  |
| CNN2     | 0.474 | 7.36E-39  |
| SBN02    | 0.338 | 2.02E-19  |
| PDIA5    | 0.49  | 6.78E-42  |
| TRAM1    | 0.348 | 1.47E-20  |
| TNFRSF1A | 0.329 | 1.99E-18  |
| HYAL2    | 0.315 | 5.67E-17  |
| LAPTM4A  | 0.341 | 8.26E-20  |
| BCL3     | 0.522 | 3.55E-48  |
| GAL      | 0.304 | 8.30E-16  |
| ATP1B3   | 0.318 | 3.32E-17  |
| RAB27A   | 0.537 | 1.44E-51  |
| WIPI1    | 0.484 | 9.60E-41  |
| P4HA2    | 0.467 | 1.03E-37  |
| FCGR2B   | 0.366 | 1.04E-22  |
| NOTCH3   | 0.321 | 1.44E-17  |
| TEAD2    | 0.319 | 2.37E-17  |
| CA12     | 0.346 | 2.49E-20  |
| LMAN1    | 0.348 | 1.37E-20  |
| MYDGF    | 0.383 | 6.97E-25  |
| SEMA3A   | 0.43  | 1.26E-31  |
| FNDC3B   | 0.492 | 3.25E-42  |
| ACTB     | 0.333 | 7.58E-19  |
| MOCOS    | 0.395 | 1.50E-26  |
| REX02    | 0.353 | 3.67E-21  |
| ICAM3    | 0.358 | 1.06E-21  |
| IL4R     | 0.383 | 6.41E-25  |
| CAPN6    | 0.442 | 1.71E-33  |
| SLC25A43 | 0.31  | 1.79E-16  |
| FBLN1    | 0.392 | 3.58E-26  |
| CST7     | 0.365 | 1.29E-22  |
| FAP      | 0.758 | 2.64E-126 |
| P2RY10   | 0.395 | 1.79E-26  |
| SDF4     | 0.342 | 6.38E-20  |
| FKBP7    | 0.427 | 3.89E-31  |

|          |        |          |
|----------|--------|----------|
| PUM3     | 0.312  | 1.17E-16 |
| ATP8B1   | 0.314  | 6.83E-17 |
| MPP4     | 0.339  | 1.58E-19 |
| COL19A1  | 0.378  | 3.41E-24 |
| PLOD1    | 0.548  | 7.95E-54 |
| FCN1     | 0.333  | 8.20E-19 |
| SLC25A24 | 0.362  | 3.14E-22 |
| B4GALT1  | 0.526  | 4.89E-49 |
| TMED2    | 0.331  | 1.33E-18 |
| FTL      | 0.326  | 4.22E-18 |
| ADAMTS2  | 0.458  | 3.30E-36 |
| MMP2     | 0.307  | 3.83E-16 |
| GNAO1    | -0.302 | 1.20E-15 |
| NID2     | 0.364  | 1.61E-22 |
| TFAP2C   | 0.404  | 9.80E-28 |
| EDEM2    | 0.311  | 1.52E-16 |
| FKBP1A   | 0.374  | 9.59E-24 |
| SIRPG    | 0.388  | 1.56E-25 |
| FXD5     | 0.381  | 1.37E-24 |
| GANAB    | 0.326  | 4.62E-18 |
| ICAM1    | 0.357  | 1.17E-21 |
| LYZ      | 0.396  | 1.02E-26 |
| EFNB1    | 0.331  | 1.08E-18 |
| DTX2     | 0.339  | 1.70E-19 |
| LAMB1    | 0.611  | 4.75E-70 |
| CMTM6    | 0.328  | 2.77E-18 |
| NANS     | 0.302  | 1.21E-15 |
| IL11     | 0.537  | 1.97E-51 |
| ITPR3    | 0.366  | 9.16E-23 |
| NRP1     | 0.503  | 2.45E-44 |
| KCNK6    | 0.343  | 5.64E-20 |
| HSD3B7   | 0.31   | 1.89E-16 |
| MAGEB2   | 0.355  | 2.28E-21 |
| MMP11    | 0.347  | 1.80E-20 |
| SUSD2    | 0.373  | 1.25E-23 |
| LGALS1   | 0.521  | 5.43E-48 |
| KDEL3    | 0.666  | 2.15E-87 |
| LMF2     | 0.343  | 5.68E-20 |
| HMOX1    | 0.311  | 1.56E-16 |
| TSPO     | 0.339  | 1.55E-19 |
| MYH9     | 0.367  | 7.37E-23 |
| NCF4     | 0.311  | 1.43E-16 |
| IL2RB    | 0.385  | 3.17E-25 |
| GZMH     | 0.349  | 1.10E-20 |
| PYGL     | 0.313  | 9.76E-17 |
| PLEK2    | 0.336  | 3.41E-19 |
| LGDN     | 0.302  | 1.34E-15 |
| BDKRB1   | 0.497  | 3.91E-43 |
| PLTP     | 0.373  | 1.40E-23 |
| MMP9     | 0.333  | 7.64E-19 |
| PROCR    | 0.421  | 3.33E-30 |

|            |       |          |
|------------|-------|----------|
| CD40       | 0.391 | 5.44E-26 |
| R3HDML     | 0.397 | 8.15E-27 |
| SLA2       | 0.354 | 2.89E-21 |
| TPD52L2    | 0.31  | 2.16E-16 |
| CTSZ       | 0.508 | 1.99E-45 |
| NTSR1      | 0.384 | 5.14E-25 |
| SLC17A9    | 0.512 | 2.83E-46 |
| MYL12A     | 0.432 | 6.64E-32 |
| MXRA5      | 0.608 | 4.20E-69 |
| TLR8       | 0.327 | 3.63E-18 |
| AMMECR1    | 0.369 | 4.23E-23 |
| SRPX       | 0.335 | 4.08E-19 |
| PLP2       | 0.35  | 8.48E-21 |
| ELF4       | 0.458 | 4.08E-36 |
| ASB9       | 0.375 | 7.70E-24 |
| SLC35A2    | 0.376 | 5.53E-24 |
| SMS        | 0.319 | 2.09E-17 |
| TIMP1      | 0.426 | 5.55E-31 |
| SRPX2      | 0.495 | 9.24E-43 |
| GLA        | 0.385 | 4.18E-25 |
| KLF5       | 0.332 | 8.99E-19 |
| ACOD1      | 0.329 | 2.24E-18 |
| TRADD      | 0.315 | 6.18E-17 |
| AQP9       | 0.365 | 1.43E-22 |
| CD276      | 0.507 | 3.09E-45 |
| FAH        | 0.341 | 9.95E-20 |
| EHD4       | 0.377 | 4.19E-24 |
| PDGFRL     | 0.436 | 1.35E-32 |
| CPQ        | 0.339 | 1.47E-19 |
| SFRP1      | 0.304 | 7.34E-16 |
| SH2D4A     | 0.35  | 7.75E-21 |
| TNFRSF10A  | 0.498 | 2.22E-43 |
| KCTD9      | 0.393 | 2.62E-26 |
| MAN2B1     | 0.37  | 3.42E-23 |
| KCNN4      | 0.364 | 1.93E-22 |
| NUCB1      | 0.327 | 3.23E-18 |
| RELB       | 0.355 | 2.21E-21 |
| FCGRT      | 0.33  | 1.38E-18 |
| RETN       | 0.408 | 2.68E-28 |
| SYDE1      | 0.329 | 1.77E-18 |
| SLC1A5     | 0.398 | 5.50E-27 |
| AC011462.1 | 0.392 | 4.29E-26 |
| CEACAM4    | 0.357 | 1.21E-21 |
| NKG7       | 0.349 | 1.24E-20 |
| CD33       | 0.308 | 3.32E-16 |
| KDELR1     | 0.335 | 4.43E-19 |
| CLEC11A    | 0.524 | 9.86E-49 |
| TFPI2      | 0.362 | 2.88E-22 |
| TWISTNB    | 0.322 | 1.14E-17 |
| CAV2       | 0.326 | 4.38E-18 |
| CAV1       | 0.436 | 1.31E-32 |

|          |       |           |
|----------|-------|-----------|
| CPED1    | 0.577 | 6.41E-61  |
| GRB10    | 0.375 | 6.33E-24  |
| NPTX2    | 0.312 | 1.23E-16  |
| PCOLCE   | 0.738 | 2.31E-116 |
| IMPDH1   | 0.553 | 4.39E-55  |
| SERPINE1 | 0.608 | 3.95E-69  |
| PLOD3    | 0.612 | 2.40E-70  |
| MEOX2    | 0.326 | 4.07E-18  |
| RARRES2  | 0.382 | 9.53E-25  |
| AHR      | 0.329 | 1.84E-18  |
| TMEM176B | 0.313 | 1.05E-16  |
| TBL2     | 0.426 | 4.94E-31  |
| LIMK1    | 0.384 | 4.74E-25  |
| ENG      | 0.465 | 2.84E-37  |
| PDLIM1   | 0.34  | 1.19E-19  |
| CXCL12   | 0.31  | 1.84E-16  |
| STN1     | 0.347 | 1.83E-20  |
| MAP3K8   | 0.33  | 1.73E-18  |
| PFN1     | 0.374 | 1.02E-23  |
| CPD      | 0.385 | 3.45E-25  |
| CCL7     | 0.317 | 3.40E-17  |
| COL1A1   | 0.643 | 1.08E-79  |
| LRRRC59  | 0.338 | 2.08E-19  |
| FAM20A   | 0.605 | 2.91E-68  |
| RAB34    | 0.31  | 2.19E-16  |
| SULT1E1  | 0.494 | 1.37E-42  |
| PF4V1    | 0.352 | 4.42E-21  |
| BST1     | 0.367 | 6.68E-23  |
| CTSC     | 0.462 | 7.03E-37  |
| MS4A6A   | 0.341 | 1.03E-19  |
| MS4A4A   | 0.381 | 1.38E-24  |
| TMEM109  | 0.355 | 2.48E-21  |
| MDK      | 0.381 | 1.18E-24  |
| SLC22A18 | 0.356 | 1.60E-21  |
| TCIRG1   | 0.378 | 2.69E-24  |
| P3H3     | 0.309 | 2.27E-16  |
| CLEC2B   | 0.458 | 3.95E-36  |
| ELK3     | 0.394 | 2.32E-26  |
| SH2B3    | 0.425 | 7.97E-31  |
| LTBR     | 0.361 | 4.39E-22  |
| MGP      | 0.323 | 7.83E-18  |
| ARHGDIB  | 0.333 | 6.72E-19  |
| VDR      | 0.596 | 7.33E-66  |
| COL12A1  | 0.304 | 7.90E-16  |
| DSE      | 0.371 | 2.25E-23  |
| MAN1A1   | 0.409 | 1.58E-28  |
| TREML2   | 0.345 | 3.66E-20  |
| CRYBG1   | 0.307 | 3.65E-16  |
| VNN1     | 0.315 | 6.28E-17  |
| VNN2     | 0.314 | 6.95E-17  |
| TRIM38   | 0.328 | 2.55E-18  |

|         |       |           |
|---------|-------|-----------|
| SMOC2   | 0.433 | 4.48E-32  |
| LAMA4   | 0.401 | 2.30E-27  |
| C7      | 0.443 | 1.16E-33  |
| DAP     | 0.304 | 8.50E-16  |
| LOX     | 0.394 | 2.31E-26  |
| GZMK    | 0.35  | 8.06E-21  |
| ST8SIA4 | 0.355 | 2.45E-21  |
| RARS    | 0.32  | 1.82E-17  |
| PDGFRB  | 0.537 | 1.44E-51  |
| CDX1    | 0.38  | 1.52E-24  |
| SSR3    | 0.317 | 3.43E-17  |
| MOB1A   | 0.31  | 2.14E-16  |
| CCL20   | 0.326 | 4.19E-18  |
| ACTR3   | 0.356 | 1.78E-21  |
| STEAP3  | 0.353 | 3.85E-21  |
| CYTIP   | 0.321 | 1.44E-17  |
| ACVR1   | 0.387 | 2.15E-25  |
| NRBP1   | 0.342 | 7.72E-20  |
| ITGA4   | 0.486 | 3.28E-41  |
| LOXL3   | 0.411 | 7.70E-29  |
| DOK1    | 0.319 | 2.29E-17  |
| EVA1A   | 0.472 | 1.21E-38  |
| FN1     | 0.537 | 1.96E-51  |
| IGFBP5  | 0.339 | 1.49E-19  |
| GGCX    | 0.331 | 1.36E-18  |
| IL1R2   | 0.316 | 4.28E-17  |
| IL1R1   | 0.332 | 8.86E-19  |
| FHL2    | 0.365 | 1.32E-22  |
| MLPH    | 0.7   | 4.69E-100 |
| HDLBP   | 0.316 | 5.34E-17  |
| SDC1    | 0.62  | 1.77E-72  |
| KYNU    | 0.389 | 9.20E-26  |
| WIPF1   | 0.343 | 5.29E-20  |
| ICMT    | 0.321 | 1.29E-17  |
| ERRFI1  | 0.39  | 8.32E-26  |
| CAPZA1  | 0.346 | 2.64E-20  |
| PRG4    | 0.495 | 8.20E-43  |
| NCF2    | 0.341 | 9.46E-20  |
| OLFML3  | 0.398 | 7.05E-27  |
| CD2     | 0.386 | 3.02E-25  |
| NID1    | 0.517 | 3.42E-47  |
| LGALS8  | 0.307 | 3.85E-16  |
| MFAP2   | 0.361 | 4.00E-22  |
| UAP1    | 0.36  | 5.69E-22  |
| ECE1    | 0.341 | 9.91E-20  |
| P3H1    | 0.628 | 5.25E-75  |
| ESYT2   | 0.308 | 3.44E-16  |
| CTSD    | 0.335 | 4.82E-19  |
| MMP8    | 0.309 | 2.72E-16  |
| VAMP8   | 0.313 | 9.23E-17  |
| RPN2    | 0.337 | 2.76E-19  |

|           |       |          |
|-----------|-------|----------|
| SPP1      | 0.328 | 2.70E-18 |
| MFSD1     | 0.351 | 6.17E-21 |
| PTPA      | 0.315 | 6.51E-17 |
| SLC46A2   | 0.306 | 4.51E-16 |
| GALNT12   | 0.319 | 2.07E-17 |
| ALG2      | 0.379 | 2.28E-24 |
| NPC2      | 0.377 | 3.96E-24 |
| LTBP2     | 0.369 | 4.34E-23 |
| TGFB3     | 0.319 | 2.16E-17 |
| TMEM214   | 0.483 | 1.61E-40 |
| TNFSF11   | 0.302 | 1.17E-15 |
| TGFBI     | 0.637 | 8.92E-78 |
| GLT8D2    | 0.559 | 1.54E-56 |
| DUSP4     | 0.338 | 1.82E-19 |
| TNFRSF10B | 0.368 | 5.87E-23 |
| SCPEP1    | 0.364 | 1.73E-22 |
| TSHZ3     | 0.355 | 2.47E-21 |
| PLBD1     | 0.513 | 2.48E-46 |
| CSTA      | 0.383 | 6.79E-25 |
| CCR2      | 0.469 | 5.48E-38 |
| XPNPEP2   | 0.483 | 1.20E-40 |
| PAEP      | 0.352 | 5.14E-21 |
| FKBP9     | 0.572 | 1.05E-59 |
| TWIST1    | 0.521 | 4.01E-48 |
| CALD1     | 0.383 | 6.07E-25 |
| PLAU      | 0.381 | 1.20E-24 |
| SRGN      | 0.314 | 6.88E-17 |
| BICC1     | 0.366 | 9.32E-23 |
| P4HA1     | 0.381 | 1.26E-24 |
| NME2P1    | 0.317 | 3.64E-17 |
| PRDX4     | 0.324 | 6.46E-18 |
| MMP19     | 0.392 | 3.58E-26 |
| COL10A1   | 0.638 | 3.53E-78 |
| SERPINA7  | 0.554 | 2.16E-55 |
| TNFAIP6   | 0.352 | 4.54E-21 |
| RAB38     | 0.411 | 9.77E-29 |
| CHPF      | 0.396 | 1.31E-26 |
| PIGT      | 0.385 | 4.04E-25 |
| SNAI1     | 0.528 | 1.67E-49 |
| PMEPA1    | 0.44  | 3.80E-33 |
| F13A1     | 0.395 | 1.47E-26 |
| TREM1     | 0.333 | 6.97E-19 |
| RUNX2     | 0.301 | 1.71E-15 |
| EREG      | 0.343 | 5.74E-20 |
| EFNB2     | 0.362 | 3.19E-22 |
| CD70      | 0.37  | 3.32E-23 |
| VASP      | 0.385 | 3.15E-25 |
| CD93      | 0.38  | 1.51E-24 |
| BFSP1     | 0.33  | 1.74E-18 |
| S1PR4     | 0.401 | 2.38E-27 |
| CCR7      | 0.347 | 1.75E-20 |

|          |       |           |
|----------|-------|-----------|
| RRAS     | 0.387 | 1.79E-25  |
| ASL      | 0.307 | 4.25E-16  |
| WNK4     | 0.36  | 4.94E-22  |
| SLC10A3  | 0.518 | 1.93E-47  |
| FGFRL1   | 0.318 | 2.96E-17  |
| ADGRE2   | 0.398 | 5.48E-27  |
| GNG11    | 0.367 | 7.19E-23  |
| PTPN12   | 0.384 | 4.74E-25  |
| STEAP4   | 0.402 | 1.63E-27  |
| SDF2L1   | 0.314 | 7.64E-17  |
| A4GALT   | 0.395 | 1.59E-26  |
| RAC2     | 0.513 | 1.89E-46  |
| LIF      | 0.301 | 1.51E-15  |
| APOBEC3F | 0.329 | 1.78E-18  |
| CALU     | 0.532 | 2.57E-50  |
| OPN1SW   | 0.339 | 1.45E-19  |
| MYO1B    | 0.45  | 8.86E-35  |
| CLN6     | 0.306 | 5.17E-16  |
| ISLR     | 0.423 | 1.75E-30  |
| LOXL1    | 0.488 | 1.85E-41  |
| CD68     | 0.377 | 4.56E-24  |
| SIGLEC9  | 0.317 | 3.46E-17  |
| RNASE1   | 0.329 | 1.76E-18  |
| CRACR2A  | 0.444 | 8.18E-34  |
| SAT1     | 0.328 | 2.66E-18  |
| NECTIN2  | 0.394 | 1.99E-26  |
| ATP8B3   | 0.306 | 5.31E-16  |
| PLVAP    | 0.341 | 9.54E-20  |
| COLGALT1 | 0.569 | 5.54E-59  |
| ARPC1B   | 0.578 | 4.62E-61  |
| PXDN     | 0.437 | 9.93E-33  |
| GDF15    | 0.302 | 1.13E-15  |
| LSP1     | 0.49  | 6.57E-42  |
| TNNT3    | 0.483 | 1.68E-40  |
| COL5A1   | 0.708 | 2.32E-103 |
| EPS8L1   | 0.329 | 1.89E-18  |
| LILRB2   | 0.393 | 2.73E-26  |
| MGAT1    | 0.386 | 2.36E-25  |
| ANO1     | 0.583 | 1.58E-62  |
| IL13RA1  | 0.319 | 2.32E-17  |
| TNS4     | 0.329 | 1.90E-18  |
| CHSY1    | 0.405 | 6.67E-28  |
| MATN3    | 0.671 | 5.26E-89  |
| CLEC10A  | 0.423 | 1.68E-30  |
| TESMIN   | 0.321 | 1.49E-17  |
| ALOX5AP  | 0.337 | 2.89E-19  |
| POSTN    | 0.355 | 1.95E-21  |
| C1QTNF6  | 0.534 | 7.75E-51  |
| GIMAP6   | 0.312 | 1.28E-16  |
| LYVE1    | 0.324 | 7.17E-18  |
| LOXL2    | 0.642 | 1.97E-79  |



|         |       |          |
|---------|-------|----------|
| EDEM1   | 0.402 | 1.70E-27 |
| PTPN22  | 0.369 | 3.86E-23 |
| FKBP11  | 0.488 | 1.41E-41 |
| LDHA    | 0.363 | 2.19E-22 |
| IL2RA   | 0.423 | 1.30E-30 |
| SLC43A3 | 0.365 | 1.15E-22 |
| COL4A2  | 0.367 | 7.15E-23 |
| KDELC1  | 0.314 | 8.41E-17 |
| STT3A   | 0.368 | 5.34E-23 |
| OSTF1   | 0.323 | 8.68E-18 |
| CTSL    | 0.4   | 3.38E-27 |
| CEMIP2  | 0.469 | 4.47E-38 |
| P2RX4   | 0.321 | 1.58E-17 |
| TES     | 0.413 | 4.68E-29 |
| MDFIC   | 0.339 | 1.43E-19 |
| CD63    | 0.319 | 2.44E-17 |
| TEC     | 0.451 | 4.84E-35 |
| FHOD1   | 0.46  | 1.92E-36 |
| FAM129A | 0.418 | 8.50E-30 |
| LAMC1   | 0.575 | 2.06E-60 |
| CKAP4   | 0.661 | 1.70E-85 |
| LCP1    | 0.345 | 3.08E-20 |
| KDELR2  | 0.518 | 1.75E-47 |
| BZW2    | 0.312 | 1.33E-16 |
| MYO1G   | 0.407 | 3.17E-28 |
| ADAMTS7 | 0.323 | 8.23E-18 |
| GALNT5  | 0.371 | 2.30E-23 |
| IL10    | 0.353 | 3.50E-21 |
| TXN     | 0.343 | 6.23E-20 |
| FAM129B | 0.427 | 3.17E-31 |
| SLC31A1 | 0.308 | 3.16E-16 |
| SIT1    | 0.366 | 1.02E-22 |
| CD72    | 0.313 | 8.91E-17 |
| LRRC32  | 0.337 | 2.41E-19 |
| PI15    | 0.339 | 1.54E-19 |
| SDCBP   | 0.312 | 1.19E-16 |
| POU2F3  | 0.354 | 2.51E-21 |
| THBS1   | 0.309 | 2.48E-16 |
| ITGA11  | 0.358 | 9.95E-22 |
| STRA6   | 0.333 | 7.65E-19 |
| CYP1B1  | 0.402 | 2.00E-27 |
| RAB1A   | 0.322 | 1.20E-17 |
| EMILIN1 | 0.674 | 3.60E-90 |
| MYOF    | 0.314 | 6.85E-17 |
| CALHM2  | 0.435 | 2.00E-32 |
| GLCE    | 0.313 | 8.85E-17 |
| CILP    | 0.476 | 3.19E-39 |
| FGF5    | 0.377 | 4.28E-24 |
| GPAT3   | 0.317 | 3.95E-17 |
| NAAA    | 0.363 | 2.18E-22 |
| CASP6   | 0.306 | 4.62E-16 |

|           |       |           |
|-----------|-------|-----------|
| LEF1      | 0.347 | 1.73E-20  |
| SLC39A8   | 0.39  | 8.04E-26  |
| FBN2      | 0.322 | 1.22E-17  |
| C1RL      | 0.311 | 1.68E-16  |
| CD27      | 0.327 | 3.32E-18  |
| GLIPR1    | 0.35  | 7.42E-21  |
| LUM       | 0.626 | 2.58E-74  |
| KERA      | 0.491 | 4.69E-42  |
| DHH       | 0.384 | 5.66E-25  |
| ACVRL1    | 0.444 | 8.93E-34  |
| GPR84     | 0.311 | 1.62E-16  |
| ESYT1     | 0.307 | 3.88E-16  |
| BCL2A1    | 0.314 | 7.90E-17  |
| TLNRD1    | 0.317 | 3.60E-17  |
| ADAMTS17  | 0.308 | 3.39E-16  |
| MCTP2     | 0.458 | 3.63E-36  |
| FURIN     | 0.505 | 1.06E-44  |
| IQGAP1    | 0.328 | 2.72E-18  |
| PMM2      | 0.427 | 4.39E-31  |
| CMTM3     | 0.303 | 1.02E-15  |
| CDH11     | 0.372 | 1.60E-23  |
| GALNS     | 0.357 | 1.29E-21  |
| IMPA2     | 0.307 | 4.30E-16  |
| SLC16A3   | 0.465 | 2.41E-37  |
| SECTM1    | 0.311 | 1.39E-16  |
| TNFRSF11A | 0.315 | 5.98E-17  |
| PMAIP1    | 0.399 | 4.41E-27  |
| P3H4      | 0.351 | 5.93E-21  |
| IGFBP4    | 0.517 | 3.83E-47  |
| FKBP10    | 0.379 | 2.48E-24  |
| COL6A1    | 0.761 | 3.62E-128 |
| COL6A2    | 0.75  | 2.64E-122 |
| IL19      | 0.352 | 5.29E-21  |
| NLRP12    | 0.342 | 7.33E-20  |
| RCN3      | 0.718 | 1.88E-107 |
| EPHA2     | 0.395 | 1.61E-26  |
| ARHGEF19  | 0.388 | 1.32E-25  |
| SH3BGRL3  | 0.414 | 3.25E-29  |
| EVA1B     | 0.516 | 4.86E-47  |
| FCN3      | 0.411 | 9.21E-29  |
| HSPG2     | 0.384 | 5.17E-25  |
| ITGA10    | 0.334 | 5.03E-19  |
| FCGR2A    | 0.409 | 2.05E-28  |
| CRABP2    | 0.358 | 1.05E-21  |
| ECM1      | 0.529 | 9.73E-50  |
| CTSK      | 0.532 | 1.91E-50  |
| CERS2     | 0.312 | 1.26E-16  |
| S100A8    | 0.354 | 2.74E-21  |
| TPM3      | 0.466 | 1.90E-37  |
| SLC39A1   | 0.336 | 3.08E-19  |
| GALNT2    | 0.322 | 1.17E-17  |

|            |       |           |
|------------|-------|-----------|
| ARF1       | 0.322 | 1.00E-17  |
| CNIH3      | 0.325 | 5.72E-18  |
| PTPN7      | 0.302 | 1.36E-15  |
| PDIA6      | 0.387 | 2.08E-25  |
| TRIM43B    | 0.478 | 1.08E-39  |
| TRIM43     | 0.465 | 2.46E-37  |
| MALL       | 0.624 | 7.02E-74  |
| RALB       | 0.406 | 4.55E-28  |
| SLC20A1    | 0.477 | 1.81E-39  |
| AL078621.1 | 0.308 | 3.11E-16  |
| SUMF1      | 0.34  | 1.23E-19  |
| OSBPL10    | 0.315 | 5.67E-17  |
| SHQ1       | 0.353 | 4.30E-21  |
| NFKBIZ     | 0.306 | 4.63E-16  |
| COL8A1     | 0.305 | 6.92E-16  |
| MANF       | 0.388 | 1.59E-25  |
| OSMR       | 0.391 | 5.67E-26  |
| GZMA       | 0.362 | 3.31E-22  |
| TSLP       | 0.315 | 6.37E-17  |
| TNFAIP8    | 0.308 | 3.03E-16  |
| YIPF5      | 0.329 | 1.95E-18  |
| DOK3       | 0.308 | 3.20E-16  |
| PPP1R18    | 0.323 | 7.96E-18  |
| TPBG       | 0.468 | 8.00E-38  |
| ARHGAP18   | 0.349 | 9.70E-21  |
| ABRACL     | 0.34  | 1.31E-19  |
| LINC00525  | 0.368 | 6.30E-23  |
| SYTL5      | 0.416 | 1.77E-29  |
| GPR174     | 0.484 | 8.75E-41  |
| IL2RG      | 0.339 | 1.42E-19  |
| NXF3       | 0.304 | 8.28E-16  |
| ZNF185     | 0.376 | 5.51E-24  |
| DOK2       | 0.469 | 5.07E-38  |
| GINS4      | 0.336 | 3.13E-19  |
| VLDLR      | 0.322 | 1.02E-17  |
| PLIN2      | 0.386 | 2.94E-25  |
| SURF4      | 0.501 | 5.98E-44  |
| GBGT1      | 0.337 | 2.47E-19  |
| PTGES      | 0.692 | 7.78E-97  |
| ITPRIP     | 0.317 | 3.53E-17  |
| ADAM12     | 0.495 | 8.63E-43  |
| SERPINH1   | 0.731 | 3.41E-113 |
| P4HA3      | 0.859 | 8.89E-197 |
| ST14       | 0.348 | 1.52E-20  |
| MPZL2      | 0.355 | 2.22E-21  |
| FERMT3     | 0.319 | 2.17E-17  |
| CLEC1A     | 0.378 | 3.16E-24  |
| ITGB1      | 0.499 | 1.32E-43  |
| LATS2      | 0.327 | 2.99E-18  |
| VEGFC      | 0.392 | 3.62E-26  |
| PRSS23     | 0.378 | 3.16E-24  |

|           |       |          |
|-----------|-------|----------|
| SEC24D    | 0.556 | 1.09E-55 |
| PLBD2     | 0.314 | 8.56E-17 |
| EXT2      | 0.337 | 2.83E-19 |
| ADAMTS12  | 0.472 | 1.62E-38 |
| ADAM8     | 0.353 | 3.58E-21 |
| TDO2      | 0.441 | 2.06E-33 |
| PABPC3    | 0.384 | 5.50E-25 |
| PSTPIP2   | 0.319 | 2.47E-17 |
| PELO      | 0.354 | 2.90E-21 |
| PLOD2     | 0.337 | 2.40E-19 |
| DAB2      | 0.309 | 2.20E-16 |
| CAST      | 0.352 | 5.19E-21 |
| TMEM87B   | 0.394 | 2.05E-26 |
| PLA2R1    | 0.433 | 4.94E-32 |
| RBMS1     | 0.425 | 6.60E-31 |
| CD96      | 0.354 | 2.53E-21 |
| CMTM7     | 0.383 | 6.54E-25 |
| CD8A      | 0.327 | 3.42E-18 |
| HS3ST3A1  | 0.355 | 1.95E-21 |
| UBASH3B   | 0.499 | 1.37E-43 |
| CERS3     | 0.46  | 1.62E-36 |
| ABCA9     | 0.473 | 8.35E-39 |
| ABCA6     | 0.307 | 3.50E-16 |
| ABCA10    | 0.311 | 1.74E-16 |
| CNTNAP3B  | 0.391 | 5.06E-26 |
| LY96      | 0.359 | 6.95E-22 |
| DKK2      | 0.423 | 1.27E-30 |
| SLC7A7    | 0.338 | 1.91E-19 |
| VSIG4     | 0.367 | 7.86E-23 |
| PDIA4     | 0.485 | 5.91E-41 |
| CLIC2     | 0.352 | 4.80E-21 |
| BATF      | 0.361 | 4.70E-22 |
| ZDHHC5    | 0.376 | 5.99E-24 |
| FRRS1     | 0.423 | 1.40E-30 |
| FAM92A1P1 | 0.303 | 1.07E-15 |
| NTAN1     | 0.438 | 6.55E-33 |
| MMP14     | 0.584 | 9.55E-63 |
| FZD1      | 0.57  | 3.33E-59 |
| KCNJ15    | 0.359 | 7.69E-22 |
| TNFRSF14  | 0.304 | 7.36E-16 |
| RER1      | 0.301 | 1.61E-15 |
| CD1D      | 0.454 | 2.09E-35 |
| CD1C      | 0.319 | 2.16E-17 |
| TAGLN2    | 0.356 | 1.79E-21 |
| SLAMF8    | 0.454 | 1.56E-35 |
| DUSP23    | 0.424 | 1.07E-30 |
| FCER1G    | 0.41  | 1.11E-28 |
| IFNGR2    | 0.393 | 2.74E-26 |
| STC1      | 0.604 | 4.70E-68 |
| PRAC1     | 0.481 | 3.77E-40 |
| HOXB13    | 0.324 | 7.42E-18 |

|         |       |          |
|---------|-------|----------|
| CIQC    | 0.319 | 2.56E-17 |
| RUNX1   | 0.406 | 5.34E-28 |
| CLDN14  | 0.306 | 5.17E-16 |
| ADPGK   | 0.406 | 5.08E-28 |
| C1R     | 0.369 | 4.51E-23 |
| MED8    | 0.316 | 4.49E-17 |
| SPON2   | 0.659 | 8.11E-85 |
| ZYX     | 0.308 | 3.44E-16 |
| PTGIR   | 0.335 | 4.02E-19 |
| G6PD    | 0.336 | 3.75E-19 |
| ITGB2   | 0.303 | 1.08E-15 |
| MPZL3   | 0.321 | 1.54E-17 |
| JAML    | 0.307 | 4.36E-16 |
| CD3G    | 0.342 | 6.84E-20 |
| CXCR5   | 0.316 | 4.84E-17 |
| SHC1    | 0.559 | 1.82E-56 |
| LMNA    | 0.483 | 1.64E-40 |
| HK3     | 0.415 | 2.54E-29 |
| LY6E    | 0.31  | 1.78E-16 |
| MGAT4B  | 0.313 | 9.08E-17 |
| PSMC2   | 0.336 | 3.48E-19 |
| PLXDC1  | 0.35  | 8.39E-21 |
| CYGB    | 0.468 | 6.00E-38 |
| ITGA5   | 0.621 | 8.74E-73 |
| ASGR2   | 0.361 | 4.49E-22 |
| SELENON | 0.367 | 7.06E-23 |
| FBLIM1  | 0.664 | 9.99E-87 |
| LAPTM5  | 0.301 | 1.63E-15 |
| MXRA8   | 0.366 | 1.02E-22 |
| DIRAS3  | 0.325 | 5.30E-18 |
| SLC30A7 | 0.316 | 4.62E-17 |
| SLAMF6  | 0.373 | 1.24E-23 |
| OLFML2B | 0.573 | 5.12E-60 |
| DENND2D | 0.307 | 3.60E-16 |
| SNED1   | 0.564 | 1.24E-57 |
| TFB2M   | 0.303 | 1.04E-15 |
| IL24    | 0.321 | 1.30E-17 |
| PQLC3   | 0.493 | 2.30E-42 |
| CTSS    | 0.363 | 2.52E-22 |
| RNF149  | 0.39  | 7.91E-26 |
| S100A11 | 0.504 | 1.55E-44 |
| S100A9  | 0.39  | 8.47E-26 |
| ANTXR2  | 0.505 | 8.14E-45 |
| COL6A3  | 0.661 | 1.43E-85 |
| EOGT    | 0.324 | 6.88E-18 |
| FSTL1   | 0.381 | 1.16E-24 |
| ARPC2   | 0.405 | 6.71E-28 |
| TGFBR2  | 0.361 | 3.86E-22 |
| TRAT1   | 0.302 | 1.10E-15 |
| PYHIN1  | 0.37  | 2.86E-23 |
| AIM2    | 0.447 | 2.72E-34 |

|          |       |          |
|----------|-------|----------|
| CTLA4    | 0.496 | 4.26E-43 |
| ICOS     | 0.34  | 1.35E-19 |
| CD200R1  | 0.353 | 3.44E-21 |
| CDCP1    | 0.449 | 1.15E-34 |
| RPN1     | 0.323 | 9.25E-18 |
| SPRY1    | 0.304 | 8.31E-16 |
| PPM1M    | 0.314 | 7.58E-17 |
| F2RL2    | 0.338 | 2.19E-19 |
| GPX8     | 0.563 | 1.93E-57 |
| ADGRF2   | 0.31  | 2.07E-16 |
| CALHM4   | 0.322 | 1.08E-17 |
| STEAP1   | 0.484 | 1.08E-40 |
| COL1A2   | 0.667 | 8.22E-88 |
| BRI3     | 0.325 | 5.95E-18 |
| CTSB     | 0.515 | 7.72E-47 |
| CTHRC1   | 0.613 | 1.86E-70 |
| DCSTAMP  | 0.457 | 5.13E-36 |
| HGSNAT   | 0.403 | 1.42E-27 |
| FBP1     | 0.352 | 4.41E-21 |
| IKBIP    | 0.505 | 1.11E-44 |
| FBN1     | 0.429 | 1.77E-31 |
| CLMP     | 0.535 | 5.17E-51 |
| C2       | 0.334 | 5.46E-19 |
| MFAP4    | 0.305 | 6.76E-16 |
| CLEC4D   | 0.346 | 2.38E-20 |
| TMED3    | 0.361 | 4.29E-22 |
| HSP90B1  | 0.371 | 2.20E-23 |
| PPIB     | 0.405 | 6.19E-28 |
| ANPEP    | 1     | 0        |
| STAT6    | 0.308 | 3.15E-16 |
| C15orf48 | 0.346 | 2.82E-20 |
| CNPY4    | 0.382 | 9.43E-25 |
| PDIA3    | 0.424 | 1.01E-30 |
| TMEM92   | 0.34  | 1.20E-19 |
| PRRX2    | 0.538 | 1.38E-51 |
| CD3D     | 0.386 | 2.82E-25 |
| TPM4     | 0.467 | 1.00E-37 |
| TUBA1C   | 0.393 | 3.09E-26 |
| SERTAD3  | 0.311 | 1.53E-16 |
| LAIR1    | 0.331 | 1.17E-18 |
| CDC42EP5 | 0.607 | 6.36E-69 |
| IGFBP6   | 0.454 | 1.55E-35 |
| SOAT2    | 0.464 | 3.64E-37 |
| CD300C   | 0.313 | 1.07E-16 |
| SCARA5   | 0.418 | 8.76E-30 |
| VASN     | 0.304 | 7.88E-16 |
| ARF4     | 0.305 | 5.95E-16 |
| BDKRB2   | 0.338 | 1.99E-19 |
| MLKL     | 0.363 | 2.21E-22 |
| RHOH     | 0.305 | 5.89E-16 |
| REEP4    | 0.359 | 8.22E-22 |

|           |       |           |
|-----------|-------|-----------|
| BMP1      | 0.527 | 3.19E-49  |
| SERINC2   | 0.301 | 1.45E-15  |
| COL3A1    | 0.607 | 6.78E-69  |
| IL7R      | 0.438 | 7.18E-33  |
| PPIC      | 0.388 | 1.43E-25  |
| SIGLEC7   | 0.331 | 1.20E-18  |
| SLC49A3   | 0.323 | 9.17E-18  |
| CHST14    | 0.351 | 6.23E-21  |
| APEX2     | 0.315 | 6.63E-17  |
| LMAN2     | 0.333 | 6.72E-19  |
| SLC50A1   | 0.394 | 2.35E-26  |
| RNASE2    | 0.326 | 4.16E-18  |
| COL22A1   | 0.324 | 7.74E-18  |
| CD52      | 0.361 | 4.04E-22  |
| ZNF280A   | 0.398 | 6.36E-27  |
| AGPAT2    | 0.37  | 3.56E-23  |
| LIMS1     | 0.372 | 1.70E-23  |
| GUSB      | 0.395 | 1.78E-26  |
| GLB1      | 0.419 | 6.59E-30  |
| B3GNT2    | 0.43  | 1.47E-31  |
| OR2A20P   | 0.407 | 3.58E-28  |
| CD14      | 0.36  | 5.68E-22  |
| SMAGP     | 0.547 | 1.13E-53  |
| EMB       | 0.37  | 3.10E-23  |
| HOXB9     | 0.344 | 3.77E-20  |
| HTRA3     | 0.438 | 8.16E-33  |
| OSCAR     | 0.303 | 9.37E-16  |
| CAVIN3    | 0.732 | 6.12E-114 |
| HAS2      | 0.315 | 6.02E-17  |
| LRRC8E    | 0.38  | 1.74E-24  |
| FPR2      | 0.337 | 2.73E-19  |
| C11orf24  | 0.369 | 4.00E-23  |
| SIGLEC17P | 0.48  | 5.71E-40  |
| C1GALT1C1 | 0.32  | 1.96E-17  |
| TMEM37    | 0.319 | 2.32E-17  |
| LRG1      | 0.415 | 2.25E-29  |
| NAT1      | 0.327 | 3.02E-18  |
| MROH2B    | 0.515 | 9.43E-47  |
| PTGER4    | 0.464 | 3.32E-37  |
| LRRC15    | 0.358 | 9.77E-22  |
| CD8B      | 0.402 | 1.66E-27  |
| CXCR6     | 0.402 | 1.98E-27  |
| CEBPB     | 0.378 | 2.83E-24  |
| STARD5    | 0.313 | 8.74E-17  |
| SMPDL3A   | 0.328 | 2.74E-18  |
| EFEMP2    | 0.363 | 2.09E-22  |
| RPL12P13  | 0.355 | 1.90E-21  |
| RAB43     | 0.341 | 8.32E-20  |
| RARG      | 0.328 | 2.69E-18  |
| MYEOV     | 0.652 | 1.04E-82  |
| MYD88     | 0.338 | 2.16E-19  |

|            |       |          |
|------------|-------|----------|
| MIR4435-2H | 0.321 | 1.55E-17 |
| GXYLT2     | 0.311 | 1.59E-16 |
| EVC2       | 0.319 | 2.10E-17 |
| BNC2       | 0.357 | 1.20E-21 |
| PPP1R3B    | 0.34  | 1.26E-19 |
| C1QB       | 0.322 | 1.24E-17 |
| C1QA       | 0.339 | 1.69E-19 |
| EHBP1L1    | 0.31  | 2.15E-16 |
| TNFRSF10D  | 0.639 | 1.85E-78 |
| TNFRSF10C  | 0.308 | 2.89E-16 |
| CD7        | 0.304 | 8.65E-16 |
| PLK3       | 0.31  | 2.13E-16 |
| DIRC1      | 0.507 | 2.86E-45 |
| SLC16A13   | 0.396 | 1.24E-26 |
| RPL35P9    | 0.323 | 8.66E-18 |
| CMKLR1     | 0.342 | 7.06E-20 |
| FAM241A    | 0.364 | 1.75E-22 |
| CD248      | 0.586 | 4.32E-63 |
| GPR171     | 0.304 | 8.39E-16 |
| CATSPER1   | 0.344 | 4.57E-20 |
| LRRC25     | 0.361 | 3.81E-22 |
| CLCF1      | 0.312 | 1.31E-16 |
| KCNE3      | 0.321 | 1.53E-17 |
| FOSL1      | 0.424 | 9.36E-31 |
| TMEM70     | 0.368 | 5.14E-23 |
| TUBB6      | 0.33  | 1.66E-18 |
| TMEM39A    | 0.355 | 2.03E-21 |
| OR10AC1    | 0.326 | 3.82E-18 |
| B3GNT5     | 0.341 | 1.03E-19 |
| FOXL1      | 0.354 | 2.54E-21 |
| METRNL     | 0.375 | 8.36E-24 |
| KRT18P28   | 0.33  | 1.38E-18 |
| TCIM       | 0.322 | 1.19E-17 |
| PHETA2     | 0.504 | 1.71E-44 |
| B3GNT8     | 0.519 | 1.53E-47 |
| HIC1       | 0.462 | 8.34E-37 |
| CAVIN1     | 0.445 | 4.99E-34 |
| CD163      | 0.379 | 2.48E-24 |
| CD151      | 0.35  | 7.77E-21 |
| FAM20C     | 0.438 | 6.21E-33 |
| BET1L      | 0.354 | 2.92E-21 |
| CALHM5     | 0.313 | 1.07E-16 |
| KDELC2     | 0.394 | 2.50E-26 |
| PRSS36     | 0.323 | 9.57E-18 |
| RPL10P16   | 0.348 | 1.62E-20 |
| CD28       | 0.337 | 2.96E-19 |
| ARMC10P1   | 0.302 | 1.21E-15 |
| THBD       | 0.357 | 1.27E-21 |
| MSC        | 0.334 | 6.35E-19 |
| SPTY2D1    | 0.327 | 3.50E-18 |
| FUCA1      | 0.345 | 3.13E-20 |



|            |       |           |
|------------|-------|-----------|
| CALR       | 0.381 | 1.08E-24  |
| APOBEC3B   | 0.398 | 6.83E-27  |
| FOXS1      | 0.462 | 7.77E-37  |
| MYADM      | 0.419 | 6.12E-30  |
| ABCA13     | 0.308 | 2.86E-16  |
| B3GNT3     | 0.456 | 7.42E-36  |
| GPBAR1     | 0.427 | 4.04E-31  |
| CCR8       | 0.346 | 2.53E-20  |
| SSC5D      | 0.346 | 2.53E-20  |
| TMEM150B   | 0.406 | 4.73E-28  |
| FO393411.1 | 0.301 | 1.45E-15  |
| TPT1P10    | 0.305 | 6.80E-16  |
| FZD2       | 0.398 | 6.43E-27  |
| PRF1       | 0.326 | 3.81E-18  |
| OR51E1     | 0.322 | 1.07E-17  |
| PDIA3P1    | 0.341 | 8.49E-20  |
| FCRL6      | 0.46  | 1.45E-36  |
| CCL13      | 0.461 | 1.11E-36  |
| TMEM45A    | 0.347 | 1.91E-20  |
| RAP2B      | 0.385 | 3.94E-25  |
| RNF135     | 0.341 | 1.01E-19  |
| TNFSF15    | 0.308 | 2.84E-16  |
| PHLDA2     | 0.545 | 2.94E-53  |
| COPG1      | 0.315 | 6.13E-17  |
| SLC35C1    | 0.496 | 5.52E-43  |
| OR4C6      | 0.717 | 6.61E-107 |
| CREB3L2    | 0.386 | 2.48E-25  |
| BACE2      | 0.451 | 4.76E-35  |
| C1S        | 0.353 | 3.45E-21  |
| BGN        | 0.507 | 3.89E-45  |
| FES        | 0.372 | 1.85E-23  |
| TSKU       | 0.459 | 2.92E-36  |
| ANXA2      | 0.467 | 1.13E-37  |
| FAM230E    | 0.514 | 1.19E-46  |
| LCK        | 0.386 | 2.46E-25  |
| COL18A1    | 0.477 | 1.49E-39  |
| SRPRA      | 0.453 | 2.23E-35  |
| MCEMP1     | 0.391 | 5.70E-26  |
| TPM3P8     | 0.373 | 1.39E-23  |
| UPP1       | 0.387 | 2.13E-25  |
| CCR4       | 0.382 | 7.82E-25  |
| KIRREL1    | 0.494 | 1.37E-42  |
| ARSI       | 0.405 | 5.83E-28  |
| SMTN       | 0.304 | 8.33E-16  |
| AC026410.1 | 0.336 | 2.99E-19  |
| OAF        | 0.566 | 3.85E-58  |
| ALDH1A3    | 0.399 | 4.37E-27  |
| PKP3       | 0.414 | 3.79E-29  |
| TMEM255B   | 0.332 | 9.42E-19  |
| SOCS3      | 0.344 | 4.11E-20  |
| TMEM173    | 0.318 | 2.65E-17  |

|            |       |          |
|------------|-------|----------|
| RPL7P26    | 0.317 | 3.63E-17 |
| TMED9      | 0.35  | 7.72E-21 |
| FAM43A     | 0.301 | 1.54E-15 |
| IFITM2     | 0.327 | 3.56E-18 |
| TCEAL9     | 0.337 | 2.82E-19 |
| TCN2       | 0.329 | 2.24E-18 |
| ACTBP7     | 0.361 | 3.67E-22 |
| P4HB       | 0.495 | 8.56E-43 |
| SLC52A2    | 0.308 | 3.08E-16 |
| RPL12P4    | 0.312 | 1.14E-16 |
| AIDA       | 0.309 | 2.40E-16 |
| AC012085.1 | 0.303 | 1.05E-15 |
| EDARADD    | 0.522 | 2.93E-48 |
| CD300E     | 0.394 | 2.39E-26 |
| TPI1P3     | 0.32  | 1.77E-17 |
| CXCR3      | 0.387 | 1.80E-25 |
| TNFRSF4    | 0.424 | 1.09E-30 |
| TNFRSF18   | 0.424 | 9.33E-31 |
| LILRA5     | 0.342 | 7.09E-20 |
| GCNT1      | 0.343 | 6.12E-20 |
| FPR3       | 0.353 | 3.41E-21 |
| COL4A1     | 0.354 | 3.22E-21 |
| RPL7P48    | 0.315 | 5.85E-17 |
| GJA4       | 0.322 | 1.03E-17 |
| POTEG      | 0.359 | 6.53E-22 |
| AGMO       | 0.324 | 6.95E-18 |
| SBK2       | 0.5   | 6.85E-44 |
| TMSB4XP8   | 0.313 | 1.06E-16 |
| TRPV2      | 0.409 | 1.67E-28 |
| CXXC1P1    | 0.307 | 4.17E-16 |
| KCTD9P3    | 0.365 | 1.51E-22 |
| RAB42      | 0.348 | 1.34E-20 |
| POTEE      | 0.353 | 3.98E-21 |
| ACTBP11    | 0.359 | 7.74E-22 |
| FAM83G     | 0.39  | 7.76E-26 |
| DPYD       | 0.374 | 8.74E-24 |
| PARVB      | 0.329 | 1.94E-18 |
| TMSB4XP2   | 0.303 | 1.09E-15 |
| RPL10AP2   | 0.308 | 2.95E-16 |
| GJB3       | 0.417 | 1.29E-29 |
| PCDH18     | 0.398 | 5.67E-27 |
| S100A4     | 0.687 | 5.92E-95 |
| OR10J3     | 0.35  | 8.23E-21 |
| PTPN1      | 0.307 | 3.59E-16 |
| EPHB4      | 0.418 | 8.84E-30 |
| S100A5     | 0.311 | 1.74E-16 |
| RFX8       | 0.611 | 4.19E-70 |
| MME        | 0.43  | 1.31E-31 |
| LAMA2      | 0.426 | 5.63E-31 |
| POTEF      | 0.368 | 6.44E-23 |
| MMP1       | 0.542 | 1.32E-52 |

|            |       |          |
|------------|-------|----------|
| POTEI      | 0.362 | 3.21E-22 |
| PDLIM7     | 0.333 | 7.58E-19 |
| TMEM26     | 0.459 | 2.94E-36 |
| CASP4      | 0.426 | 5.89E-31 |
| SIGLEC15   | 0.693 | 2.27E-97 |
| SND1       | 0.306 | 5.39E-16 |
| SERPINA1   | 0.315 | 6.46E-17 |
| KANK2      | 0.347 | 1.84E-20 |
| GTF2E2     | 0.381 | 1.28E-24 |
| SVIL       | 0.355 | 1.89E-21 |
| C5AR1      | 0.357 | 1.16E-21 |
| GSTK1      | 0.304 | 6.97E-16 |
| SLC2A10    | 0.33  | 1.61E-18 |
| DPP4       | 0.439 | 5.81E-33 |
| FAM114A1   | 0.479 | 7.27E-40 |
| PTMAP2     | 0.329 | 2.09E-18 |
| CFD        | 0.305 | 6.92E-16 |
| MYO1C      | 0.506 | 5.28E-45 |
| CHSY3      | 0.434 | 2.75E-32 |
| TOR4A      | 0.4   | 3.75E-27 |
| PTMAP9     | 0.326 | 4.00E-18 |
| FKBP1C     | 0.359 | 6.43E-22 |
| TMEM239    | 0.343 | 5.11E-20 |
| PIM3       | 0.313 | 8.79E-17 |
| TPM2       | 0.335 | 4.60E-19 |
| ITGBL1     | 0.33  | 1.39E-18 |
| PAPSS2     | 0.35  | 7.84E-21 |
| GLMP       | 0.425 | 7.13E-31 |
| APCDD1L    | 0.477 | 2.04E-39 |
| CD247      | 0.316 | 5.08E-17 |
| CD3E       | 0.369 | 4.83E-23 |
| OSTC       | 0.411 | 8.93E-29 |
| NAGA       | 0.367 | 7.35E-23 |
| TGM2       | 0.326 | 4.09E-18 |
| AC004988.1 | 0.573 | 7.12E-60 |
| CR1        | 0.312 | 1.10E-16 |
| FCGR3A     | 0.33  | 1.60E-18 |
| TMEM244    | 0.557 | 6.08E-56 |
| HSP90B3P   | 0.329 | 1.95E-18 |
| ARMCX7P    | 0.317 | 4.15E-17 |
| COL5A2     | 0.607 | 9.02E-69 |
| COL15A1    | 0.594 | 2.05E-65 |
| LAYN       | 0.404 | 8.36E-28 |
| POTEKP     | 0.324 | 6.30E-18 |
| LILRB3     | 0.351 | 6.31E-21 |
| ARHGEF34P  | 0.4   | 3.47E-27 |
| CFI        | 0.357 | 1.17E-21 |
| AC121338.1 | 0.511 | 6.40E-46 |
| ITPRIPL2   | 0.355 | 2.14E-21 |
| MIR635     | 0.353 | 4.11E-21 |
| MIR216A    | 0.349 | 1.17E-20 |

|            |       |          |
|------------|-------|----------|
| IGLV3-27   | 0.453 | 2.29E-35 |
| TRBV7-3    | 0.301 | 1.55E-15 |
| TRBV5-1    | 0.301 | 1.66E-15 |
| TRBV19     | 0.438 | 6.10E-33 |
| TRBV20-1   | 0.367 | 7.28E-23 |
| TRBV28     | 0.372 | 1.84E-23 |
| TRAV6      | 0.358 | 9.45E-22 |
| TRAV10     | 0.419 | 6.16E-30 |
| TRAV12-2   | 0.339 | 1.57E-19 |
| TRAV8-4    | 0.335 | 3.91E-19 |
| TRAV14DV4  | 0.387 | 2.08E-25 |
| TRAV9-2    | 0.323 | 8.60E-18 |
| TRAV26-1   | 0.336 | 3.23E-19 |
| TRAJ23     | 0.588 | 8.16E-64 |
| TRAJ22     | 0.479 | 8.71E-40 |
| IGHG2      | 0.328 | 2.80E-18 |
| IGHV1-46   | 0.441 | 2.58E-33 |
| IGHV3-49   | 0.325 | 5.02E-18 |
| RPL31P11   | 0.311 | 1.44E-16 |
| AC069218.1 | 0.381 | 1.30E-24 |
| ARHGEF35   | 0.542 | 1.22E-52 |
| YWHAZP2    | 0.334 | 5.50E-19 |
| IFITM9P    | 0.329 | 2.24E-18 |
| AC005521.1 | 0.313 | 9.77E-17 |
| AC108073.1 | 0.318 | 3.06E-17 |
| FTH1P12    | 0.324 | 6.33E-18 |
| AC022210.1 | 0.304 | 8.68E-16 |
| ANXA2P1    | 0.366 | 1.02E-22 |
| GAPDHP28   | 0.316 | 5.22E-17 |
| FTH1P3     | 0.311 | 1.51E-16 |
| ACTN4P1    | 0.35  | 9.00E-21 |
| PPIAP16    | 0.314 | 8.20E-17 |
| RPLPOP6    | 0.308 | 2.83E-16 |
| LDHAP5     | 0.305 | 6.55E-16 |
| HEXA       | 0.367 | 8.34E-23 |
| AC240504.1 | 0.383 | 6.39E-25 |
| CLIC1      | 0.398 | 6.02E-27 |
| AP002982.1 | 0.383 | 7.66E-25 |
| ACTBP2     | 0.361 | 4.52E-22 |
| EIF1P7     | 0.324 | 6.94E-18 |
| AL080243.1 | 0.337 | 2.80E-19 |
| ITGA1      | 0.327 | 3.20E-18 |
| AC078899.1 | 0.325 | 5.75E-18 |
| AC091807.1 | 0.421 | 3.33E-30 |
| TSPAN4     | 0.396 | 1.03E-26 |
| AL390728.1 | 0.301 | 1.55E-15 |
| ALG3       | 0.383 | 7.30E-25 |
| PTMAP5     | 0.321 | 1.49E-17 |
| RPS4XP1    | 0.313 | 1.07E-16 |
| LGMNP1     | 0.381 | 1.16E-24 |
| NPS        | 0.325 | 5.10E-18 |

|            |       |           |
|------------|-------|-----------|
| LINC02085  | 0.313 | 1.04E-16  |
| RPL7P1     | 0.353 | 3.67E-21  |
| RPS4XP3    | 0.308 | 2.84E-16  |
| IFRD2      | 0.316 | 4.33E-17  |
| ZFYVE9P2   | 0.331 | 1.33E-18  |
| PKMP5      | 0.34  | 1.11E-19  |
| XRCC6P5    | 0.339 | 1.69E-19  |
| GPX1P2     | 0.307 | 4.28E-16  |
| RCN1P1     | 0.317 | 3.50E-17  |
| CNN2P7     | 0.361 | 3.83E-22  |
| AL354702.1 | 0.417 | 1.20E-29  |
| IFI30      | 0.366 | 1.06E-22  |
| ANXA2P3    | 0.381 | 1.37E-24  |
| RPS2P55    | 0.309 | 2.31E-16  |
| RPL10P1    | 0.332 | 9.64E-19  |
| TPT1P4     | 0.322 | 1.17E-17  |
| PPIAP31    | 0.308 | 3.05E-16  |
| AC136632.1 | 0.309 | 2.24E-16  |
| RPS4XP7    | 0.301 | 1.47E-15  |
| AL592429.1 | 0.379 | 2.36E-24  |
| AL391903.1 | 0.326 | 3.87E-18  |
| AC005102.1 | 0.32  | 2.05E-17  |
| RPS20P2    | 0.322 | 1.00E-17  |
| AL357515.1 | 0.351 | 7.39E-21  |
| AC019129.1 | 0.423 | 1.40E-30  |
| RPL23P8    | 0.301 | 1.53E-15  |
| FTH1P8     | 0.339 | 1.65E-19  |
| AL356432.2 | 0.313 | 9.01E-17  |
| RPL7P27    | 0.308 | 2.79E-16  |
| ACTBP8     | 0.349 | 1.00E-20  |
| AL032822.1 | 0.304 | 7.59E-16  |
| OSTCP4     | 0.333 | 6.88E-19  |
| EBF2       | 0.324 | 7.43E-18  |
| AC112721.1 | 0.748 | 1.57E-121 |
| AC112721.2 | 0.719 | 7.25E-108 |
| POTEJ      | 0.332 | 1.03E-18  |
| CYTOR      | 0.318 | 2.87E-17  |
| FTH1P10    | 0.349 | 1.12E-20  |
| LINC01615  | 0.33  | 1.75E-18  |
| TMSB4XP4   | 0.306 | 5.10E-16  |
| AC002463.1 | 0.354 | 2.66E-21  |
| IGHV3-64   | 0.313 | 9.31E-17  |
| AC023157.1 | 0.317 | 4.22E-17  |
| AC006145.1 | 0.419 | 6.12E-30  |
| RPS20P14   | 0.362 | 3.53E-22  |
| LINC01870  | 0.343 | 5.99E-20  |
| AC002486.1 | 0.308 | 3.49E-16  |
| AC116917.1 | 0.358 | 9.72E-22  |
| AL353616.1 | 0.354 | 2.86E-21  |
| LINC02561  | 0.317 | 3.67E-17  |
| ARSEP1     | 0.436 | 1.48E-32  |

|            |       |          |
|------------|-------|----------|
| AC104823.1 | 0.42  | 3.61E-30 |
| MIR3681HG  | 0.311 | 1.53E-16 |
| SMIM25     | 0.39  | 7.03E-26 |
| AP001476.1 | 0.645 | 2.89E-80 |
| RPL29P19   | 0.304 | 7.64E-16 |
| HSPA8P7    | 0.33  | 1.42E-18 |
| AC006026.1 | 0.302 | 1.34E-15 |
| UBE2D3P1   | 0.338 | 2.03E-19 |
| LINC00337  | 0.438 | 7.93E-33 |
| PPIAP8     | 0.331 | 1.21E-18 |
| RPL8P2     | 0.329 | 1.96E-18 |
| RBMS1P1    | 0.343 | 5.29E-20 |
| BX119917.1 | 0.367 | 7.69E-23 |
| AL358942.1 | 0.31  | 2.07E-16 |
| AL121871.1 | 0.331 | 1.19E-18 |
| ABHD11-AS1 | 0.359 | 6.50E-22 |
| AP001434.1 | 0.308 | 3.39E-16 |
| SEC11B     | 0.337 | 2.49E-19 |
| RPL26P19   | 0.315 | 6.60E-17 |
| ARPC3P1    | 0.314 | 7.03E-17 |
| GAPDHP32   | 0.312 | 1.37E-16 |
| AC018735.1 | 0.321 | 1.57E-17 |
| FTH1P20    | 0.315 | 5.55E-17 |
| FTLP3      | 0.376 | 4.87E-24 |
| TRBV2      | 0.319 | 2.61E-17 |
| AC073409.1 | 0.315 | 5.41E-17 |
| HNRNPA3P1  | 0.309 | 2.39E-16 |
| AC011893.1 | 0.541 | 2.57E-52 |
| AL117382.1 | 0.461 | 1.17E-36 |
| RPS4XP2    | 0.329 | 2.22E-18 |
| AF130417.1 | 0.472 | 1.47E-38 |
| FTH1P16    | 0.324 | 7.07E-18 |
| AP001471.1 | 0.429 | 1.80E-31 |
| HNRNPA1P21 | 0.405 | 6.40E-28 |
| AP001476.3 | 0.39  | 7.35E-26 |
| LYPLA2P1   | 0.311 | 1.67E-16 |
| AL158201.1 | 0.302 | 1.36E-15 |
| FTLP17     | 0.353 | 4.19E-21 |
| AL109741.2 | 0.323 | 9.44E-18 |
| TMSB10P1   | 0.398 | 6.58E-27 |
| LYPLAL1-AS | 0.652 | 1.60E-82 |
| AL513323.1 | 0.459 | 2.52E-36 |
| LINC02577  | 0.47  | 2.65E-38 |
| AL359918.1 | 0.324 | 6.29E-18 |
| AC006483.1 | 0.433 | 4.48E-32 |
| HECW2-AS1  | 0.528 | 1.81E-49 |
| EIF4A1P10  | 0.347 | 1.69E-20 |
| ACTBP1     | 0.339 | 1.41E-19 |
| SERPINH1P1 | 0.546 | 1.57E-53 |
| ACTG1P9    | 0.31  | 1.88E-16 |
| LINC01204  | 0.498 | 2.60E-43 |

|            |       |          |
|------------|-------|----------|
| AL109810.1 | 0.311 | 1.65E-16 |
| MYL8P      | 0.318 | 2.66E-17 |
| RPL4P4     | 0.302 | 1.17E-15 |
| MYOSLID    | 0.336 | 3.05E-19 |
| RPL7P10    | 0.319 | 2.31E-17 |
| AC018866.1 | 0.582 | 3.26E-62 |
| ELOCP3     | 0.362 | 3.06E-22 |
| HSPD1P6    | 0.362 | 2.75E-22 |
| AC139143.1 | 0.323 | 8.95E-18 |
| AC016738.2 | 0.36  | 5.12E-22 |
| AC018463.1 | 0.323 | 8.29E-18 |
| AC006970.1 | 0.37  | 2.92E-23 |
| DDX43P3    | 0.433 | 4.59E-32 |
| AL450405.1 | 0.351 | 7.00E-21 |
| FTH1P5     | 0.308 | 3.13E-16 |
| HSPB1P2    | 0.387 | 2.08E-25 |
| BX088651.3 | 0.332 | 8.70E-19 |
| NFE4       | 0.359 | 7.36E-22 |
| AC078817.1 | 0.316 | 5.33E-17 |
| ACTG1P23   | 0.303 | 9.99E-16 |
| LINC01747  | 0.507 | 4.18E-45 |
| AP000695.1 | 0.366 | 9.33E-23 |
| ACTG1P14   | 0.304 | 7.56E-16 |
| GPAA1P2    | 0.301 | 1.68E-15 |
| PABPC1P3   | 0.359 | 7.80E-22 |
| AL450003.1 | 0.308 | 3.31E-16 |
| AL161636.2 | 0.309 | 2.35E-16 |
| AC068580.2 | 0.336 | 3.81E-19 |
| LINC01614  | 0.316 | 4.72E-17 |
| AC013404.1 | 0.309 | 2.59E-16 |
| SPATA20P1  | 0.338 | 2.03E-19 |
| TUBB4BP6   | 0.376 | 5.57E-24 |
| ARF4P4     | 0.307 | 3.84E-16 |
| SBK3       | 0.466 | 1.31E-37 |
| MANCR      | 0.4   | 3.56E-27 |
| CLIC1P1    | 0.387 | 2.26E-25 |
| AC105450.1 | 0.501 | 6.43E-44 |
| LINC02015  | 0.346 | 2.43E-20 |
| EIF1P3     | 0.337 | 2.59E-19 |
| PABPC1P1   | 0.398 | 6.35E-27 |
| EMBP1      | 0.328 | 2.76E-18 |
| AC012354.2 | 0.322 | 1.02E-17 |
| AC073316.2 | 0.427 | 4.42E-31 |
| AC024082.2 | 0.384 | 5.50E-25 |
| ANXA2P2    | 0.463 | 5.96E-37 |
| CAP1P2     | 0.321 | 1.53E-17 |
| LEF1-AS1   | 0.304 | 8.39E-16 |
| AP001057.1 | 0.325 | 5.11E-18 |
| P2RY10BP   | 0.418 | 7.62E-30 |
| FTH1P7     | 0.327 | 3.19E-18 |
| SLC25A6P2  | 0.348 | 1.66E-20 |

|            |       |          |
|------------|-------|----------|
| IGHV3-43   | 0.324 | 7.33E-18 |
| FTH1P1     | 0.322 | 1.13E-17 |
| AC009299.2 | 0.326 | 3.99E-18 |
| AC093627.1 | 0.589 | 6.14E-64 |
| Z74021.1   | 0.332 | 9.45E-19 |
| FTLP2      | 0.377 | 4.15E-24 |
| AL583856.1 | 0.339 | 1.57E-19 |
| EEF1B2P3   | 0.304 | 8.37E-16 |
| RPL3P12    | 0.314 | 8.12E-17 |
| POLR3KP1   | 0.308 | 3.31E-16 |
| ACTG1P21   | 0.313 | 9.79E-17 |
| TRIM51JP   | 0.477 | 1.83E-39 |
| AL645568.3 | 0.305 | 6.17E-16 |
| ITGA6-AS1  | 0.303 | 9.60E-16 |
| SDCBPP3    | 0.326 | 4.07E-18 |
| TRBV29-1   | 0.325 | 5.93E-18 |
| CYP1B1-AS1 | 0.489 | 1.11E-41 |
| AC011899.2 | 0.322 | 1.14E-17 |
| PFN1P1     | 0.372 | 1.53E-23 |
| ERP29P1    | 0.355 | 2.38E-21 |
| RPS2P48    | 0.312 | 1.11E-16 |
| AL445524.1 | 0.327 | 2.93E-18 |
| AC008163.1 | 0.436 | 1.57E-32 |
| LINC00460  | 0.55  | 2.55E-54 |
| TWIST2     | 0.678 | 9.05E-92 |
| PSMA6P3    | 0.588 | 8.14E-64 |
| AP000695.2 | 0.339 | 1.63E-19 |
| LINC02599  | 0.515 | 1.00E-46 |
| LINC01503  | 0.323 | 9.16E-18 |
| FTLP15     | 0.304 | 8.16E-16 |
| RPS20P10   | 0.332 | 9.23E-19 |
| GDI2P2     | 0.311 | 1.56E-16 |
| TXNP6      | 0.302 | 1.23E-15 |
| RPL10P12   | 0.303 | 1.08E-15 |
| OSTCP5     | 0.322 | 1.23E-17 |
| RPS4XP11   | 0.334 | 6.08E-19 |
| AC026462.1 | 0.426 | 6.02E-31 |
| AL162151.2 | 0.313 | 8.63E-17 |
| LINC01934  | 0.339 | 1.58E-19 |
| TPT1P9     | 0.309 | 2.56E-16 |
| SVIL2P     | 0.366 | 1.03E-22 |
| XRCC6P2    | 0.335 | 4.04E-19 |
| FTH1P2     | 0.336 | 3.63E-19 |
| EIF4A1P2   | 0.341 | 9.23E-20 |
| TMSB10P2   | 0.379 | 2.51E-24 |
| RPEL1      | 0.315 | 6.26E-17 |
| AC113174.1 | 0.44  | 3.24E-33 |
| EIF4A1P7   | 0.351 | 6.81E-21 |
| RNF148     | 0.306 | 4.54E-16 |
| RPL10P5    | 0.318 | 3.24E-17 |
| MXRA5Y     | 0.696 | 1.27E-98 |



|            |       |          |
|------------|-------|----------|
| LINC01936  | 0.405 | 5.84E-28 |
| PRRX2-AS1  | 0.313 | 9.75E-17 |
| HSPB1P1    | 0.388 | 1.33E-25 |
| AC026355.2 | 0.696 | 1.87E-98 |
| PKMP1      | 0.361 | 4.35E-22 |
| AC003986.3 | 0.411 | 8.61E-29 |
| AC116049.1 | 0.339 | 1.63E-19 |
| RAD23BP1   | 0.316 | 4.65E-17 |
| S100A11P2  | 0.463 | 4.71E-37 |
| EIF4A1P6   | 0.37  | 2.75E-23 |
| RPL19P16   | 0.327 | 3.40E-18 |
| AC007750.1 | 0.368 | 5.89E-23 |
| RPS20P24   | 0.308 | 3.01E-16 |
| TMSB4XP1   | 0.311 | 1.53E-16 |
| NDUFA5P8   | 0.385 | 3.62E-25 |
| AC147651.4 | 0.393 | 2.68E-26 |
| IMPDH1P4   | 0.351 | 5.74E-21 |
| TRBV30     | 0.309 | 2.67E-16 |
| FTH1P11    | 0.325 | 5.59E-18 |
| CDC42P6    | 0.413 | 4.63E-29 |
| AC034102.1 | 0.361 | 4.49E-22 |
| AC007384.1 | 0.483 | 1.76E-40 |
| S100A11P1  | 0.427 | 4.13E-31 |
| TRBV3-1    | 0.356 | 1.76E-21 |
| AC097713.2 | 0.362 | 3.39E-22 |
| AC002066.1 | 0.369 | 3.74E-23 |
| PA2G4P1    | 0.334 | 5.36E-19 |
| AC073130.1 | 0.68  | 2.03E-92 |
| AC245884.4 | 0.349 | 1.01E-20 |
| ACTG1P19   | 0.336 | 3.20E-19 |
| AL391832.2 | 0.376 | 6.15E-24 |
| AP000844.2 | 0.521 | 6.27E-48 |
| AC008753.1 | 0.327 | 3.28E-18 |
| TXNDC5     | 0.565 | 5.97E-58 |
| AC108724.1 | 0.308 | 3.00E-16 |
| RPL37P2    | 0.338 | 1.82E-19 |
| IGKV2D-30  | 0.348 | 1.57E-20 |
| APOBEC3G   | 0.335 | 4.29E-19 |
| AC093627.2 | 0.487 | 2.14E-41 |
| AL133163.1 | 0.332 | 9.17E-19 |
| AC093627.3 | 0.438 | 7.04E-33 |
| AC017002.3 | 0.322 | 1.09E-17 |
| AC010343.1 | 0.305 | 5.78E-16 |
| LINC00973  | 0.691 | 1.92E-96 |
| RPL3P9     | 0.304 | 8.19E-16 |
| RPL30P12   | 0.302 | 1.29E-15 |
| C1QTNF9    | 0.461 | 9.65E-37 |
| AC093627.4 | 0.489 | 1.26E-41 |
| IGKV1-16   | 0.312 | 1.23E-16 |
| AC021074.1 | 0.351 | 6.22E-21 |
| RPL22P2    | 0.309 | 2.29E-16 |

|            |       |          |
|------------|-------|----------|
| RPL17P44   | 0.318 | 2.74E-17 |
| AC245047.8 | 0.32  | 1.73E-17 |
| RPL7P19    | 0.32  | 1.64E-17 |
| HSPA8P9    | 0.315 | 6.53E-17 |
| AL355032.1 | 0.326 | 4.28E-18 |
| ARPC1A     | 0.386 | 2.37E-25 |
| LINC02657  | 0.331 | 1.12E-18 |
| AC113398.1 | 0.337 | 2.42E-19 |
| FTH1P23    | 0.327 | 3.33E-18 |
| FTH1P4     | 0.327 | 2.95E-18 |
| AC079760.2 | 0.363 | 2.36E-22 |
| AC007686.1 | 0.358 | 8.50E-22 |
| IGKV2-30   | 0.322 | 1.18E-17 |
| IGKV2D-29  | 0.301 | 1.38E-15 |
| EFNA4      | 0.325 | 4.76E-18 |
| RPL3P3     | 0.312 | 1.19E-16 |
| TICAM2     | 0.32  | 1.99E-17 |
| IL10RB     | 0.45  | 8.11E-35 |
| RPS4XP14   | 0.303 | 9.33E-16 |
| RPLPOP2    | 0.401 | 2.36E-27 |
| TMEM35B    | 0.384 | 4.47E-25 |
| APOBEC3D   | 0.362 | 3.11E-22 |
| RPL12P6    | 0.328 | 2.59E-18 |
| AC073359.2 | 0.332 | 1.06E-18 |
| DDOST      | 0.339 | 1.50E-19 |
| RPS4XP17   | 0.304 | 7.15E-16 |
| AC133134.1 | 0.353 | 3.33E-21 |
| AC147067.1 | 0.439 | 5.66E-33 |
| LILRA6     | 0.349 | 1.02E-20 |
| APOBEC3C   | 0.409 | 1.54E-28 |
| RPL12P33   | 0.326 | 3.85E-18 |
| CASC8      | 0.471 | 2.43E-38 |
| AC100861.1 | 0.458 | 4.28E-36 |
| LINC00920  | 0.404 | 1.01E-27 |
| TWF2       | 0.349 | 1.07E-20 |
| ADH1C      | 0.469 | 4.21E-38 |
| APELA      | 0.506 | 5.06E-45 |
| LINC02434  | 0.583 | 2.40E-62 |
| AC187653.1 | 0.301 | 1.44E-15 |
| AC098859.1 | 0.301 | 1.51E-15 |
| AC131254.1 | 0.531 | 3.45E-50 |
| AC093895.1 | 0.304 | 7.92E-16 |
| ADAM20P3   | 0.424 | 1.26E-30 |
| LINC01091  | 0.394 | 2.12E-26 |
| SERBP1P5   | 0.305 | 6.41E-16 |
| AC099509.1 | 0.395 | 1.65E-26 |
| AC145676.1 | 0.385 | 3.91E-25 |
| AC239584.1 | 0.377 | 4.04E-24 |
| AC093791.1 | 0.311 | 1.63E-16 |
| AC069360.1 | 0.379 | 1.94E-24 |
| AC116563.1 | 0.318 | 3.09E-17 |

|            |       |           |
|------------|-------|-----------|
| AC079140.2 | 0.305 | 6.80E-16  |
| GMPSP1     | 0.314 | 6.98E-17  |
| LINC01303  | 0.323 | 7.88E-18  |
| AC098591.2 | 0.411 | 1.06E-28  |
| AC097451.1 | 0.383 | 6.41E-25  |
| AC146944.2 | 0.324 | 6.42E-18  |
| AC010343.3 | 0.497 | 3.10E-43  |
| AC080079.1 | 0.348 | 1.65E-20  |
| AC105250.1 | 0.398 | 6.16E-27  |
| AC025470.2 | 0.419 | 6.08E-30  |
| AC020551.1 | 0.397 | 8.14E-27  |
| AC091173.1 | 0.646 | 1.12E-80  |
| LDHAP1     | 0.32  | 2.04E-17  |
| MSNP1      | 0.34  | 1.15E-19  |
| LINC02278  | 0.338 | 2.06E-19  |
| RF00397    | 0.367 | 8.10E-23  |
| AC004707.1 | 0.443 | 1.12E-33  |
| LINC01605  | 0.425 | 7.06E-31  |
| AC109479.1 | 0.397 | 7.55E-27  |
| NRBF2P4    | 0.31  | 1.82E-16  |
| TMEM200B   | 0.478 | 1.13E-39  |
| AC016868.1 | 0.422 | 1.87E-30  |
| AC022915.1 | 0.621 | 5.98E-73  |
| SEPT10P1   | 0.317 | 3.46E-17  |
| AC107959.3 | 0.328 | 2.79E-18  |
| TAGLN2P1   | 0.367 | 7.72E-23  |
| AC026904.2 | 0.327 | 3.67E-18  |
| AC026904.3 | 0.537 | 1.45E-51  |
| AC091182.2 | 0.354 | 2.99E-21  |
| IGLV1-41   | 0.531 | 3.29E-50  |
| TNFRSF10A- | 0.346 | 2.36E-20  |
| HMG1P38    | 0.318 | 2.79E-17  |
| CLDN23     | 0.553 | 5.38E-55  |
| PKMP4      | 0.362 | 2.85E-22  |
| LINC01947  | 0.308 | 3.37E-16  |
| AC087672.2 | 0.416 | 1.42E-29  |
| AF201337.1 | 0.451 | 6.21E-35  |
| MYL12AP1   | 0.312 | 1.11E-16  |
| LINC02584  | 0.67  | 1.16E-88  |
| SIGLEC12   | 0.621 | 4.80E-73  |
| AP003555.2 | 0.768 | 9.87E-132 |
| AC080023.2 | 0.342 | 7.47E-20  |
| OR2AL1P    | 0.459 | 2.18E-36  |
| AC023232.1 | 0.373 | 1.43E-23  |
| SLC22A18AS | 0.313 | 9.88E-17  |
| AC113404.3 | 0.314 | 8.44E-17  |
| AP003386.1 | 0.513 | 2.29E-46  |
| AC108136.1 | 0.405 | 7.35E-28  |
| TRAV1-1    | 0.341 | 8.49E-20  |
| LINC00944  | 0.33  | 1.49E-18  |
| LINC02454  | 0.405 | 6.92E-28  |

|            |       |          |
|------------|-------|----------|
| LINC02376  | 0.353 | 4.09E-21 |
| AC092470.1 | 0.393 | 3.37E-26 |
| HSPA8P5    | 0.324 | 7.66E-18 |
| RPL31P57   | 0.357 | 1.19E-21 |
| AP005019.1 | 0.402 | 1.50E-27 |
| AP002784.2 | 0.314 | 7.92E-17 |
| AC090023.2 | 0.315 | 6.26E-17 |
| AP001453.2 | 0.337 | 2.51E-19 |
| AC026369.3 | 0.325 | 5.12E-18 |
| RARSP1     | 0.341 | 9.97E-20 |
| AP003174.3 | 0.339 | 1.55E-19 |
| AC009729.1 | 0.476 | 2.54E-39 |
| LINC02354  | 0.38  | 1.61E-24 |
| AC073611.2 | 0.435 | 2.23E-32 |
| LBX2-AS1   | 0.444 | 8.74E-34 |
| EIF4A1P4   | 0.363 | 2.59E-22 |
| HMGA1P3    | 0.327 | 3.01E-18 |
| SLC25A3P2  | 0.304 | 8.27E-16 |
| RBM8B      | 0.323 | 8.15E-18 |
| EIF3LP1    | 0.301 | 1.58E-15 |
| LINC00239  | 0.456 | 7.55E-36 |
| LINC00520  | 0.466 | 1.68E-37 |
| AL355102.4 | 0.396 | 1.02E-26 |
| LINC02289  | 0.307 | 3.87E-16 |
| AC104390.1 | 0.336 | 3.78E-19 |
| AL049775.2 | 0.685 | 2.40E-94 |
| AL135978.1 | 0.315 | 5.39E-17 |
| AC104002.3 | 0.301 | 1.57E-15 |
| ITGB3      | 0.354 | 2.82E-21 |
| LINC02345  | 0.415 | 2.51E-29 |
| IGHV40R15- | 0.306 | 4.96E-16 |
| AC026956.1 | 0.333 | 7.33E-19 |
| HSP90B2P   | 0.379 | 2.33E-24 |
| AC009093.1 | 0.419 | 6.65E-30 |
| LINC02126  | 0.317 | 4.21E-17 |
| AL121578.3 | 0.309 | 2.75E-16 |
| MRC1       | 0.378 | 3.22E-24 |
| MOCS1P1    | 0.318 | 2.84E-17 |
| AC009093.2 | 0.411 | 9.70E-29 |
| AC023043.1 | 0.494 | 1.03E-42 |
| FOXC2-AS1  | 0.344 | 4.63E-20 |
| AC004847.1 | 0.412 | 5.65E-29 |
| AC113418.1 | 0.319 | 2.41E-17 |
| LM07-AS1   | 0.422 | 1.92E-30 |
| LINC01989  | 0.486 | 4.55E-41 |
| AC134312.5 | 0.49  | 5.87E-42 |
| PECAM1     | 0.336 | 3.59E-19 |
| AC092368.3 | 0.318 | 2.86E-17 |
| FSCN1P1    | 0.317 | 3.56E-17 |
| AP003119.3 | 0.342 | 7.08E-20 |
| LOXL1-AS1  | 0.349 | 1.13E-20 |

|            |       |          |
|------------|-------|----------|
| AC087392.1 | 0.309 | 2.77E-16 |
| AC129507.4 | 0.316 | 4.51E-17 |
| AC022035.1 | 0.638 | 3.50E-78 |
| AC005291.1 | 0.514 | 1.16E-46 |
| AC116003.1 | 0.486 | 4.20E-41 |
| LINC01910  | 0.309 | 2.69E-16 |
| AC091588.3 | 0.356 | 1.87E-21 |
| GAPLINC    | 0.377 | 4.54E-24 |
| ACTBP9     | 0.343 | 5.29E-20 |
| AC005262.1 | 0.324 | 7.56E-18 |
| FTLP5      | 0.355 | 2.00E-21 |
| LINC01929  | 0.426 | 4.82E-31 |
| AC090409.1 | 0.347 | 2.00E-20 |
| AC010649.1 | 0.427 | 3.28E-31 |
| AC079210.1 | 0.426 | 5.88E-31 |
| AC010327.3 | 0.307 | 3.96E-16 |
| LINC01482  | 0.413 | 4.96E-29 |
| AC098847.1 | 0.322 | 1.00E-17 |
| AC093567.1 | 0.364 | 1.65E-22 |
| AC243960.2 | 0.393 | 3.43E-26 |
| AC010328.2 | 0.371 | 2.35E-23 |
| CKS1BP3    | 0.312 | 1.25E-16 |
| LYPLA2P2   | 0.352 | 4.73E-21 |
| AC010422.3 | 0.325 | 5.54E-18 |
| AC022149.1 | 0.535 | 5.58E-51 |
| AC008763.3 | 0.312 | 1.19E-16 |
| AL353593.1 | 0.373 | 1.13E-23 |
| IGHV10R15- | 0.311 | 1.58E-16 |
| IGHV3-30   | 0.321 | 1.36E-17 |
| NBPF14     | 0.35  | 8.45E-21 |
| AL606490.9 | 0.355 | 1.98E-21 |
| PDLIM1P1   | 0.361 | 4.61E-22 |
| IGHV30R16- | 0.334 | 5.57E-19 |
| AC009948.3 | 0.44  | 3.72E-33 |
| CTHRC1P1   | 0.481 | 2.88E-40 |
| IGHV30R16- | 0.359 | 6.38E-22 |
| AC012498.2 | 0.313 | 1.08E-16 |
| IGHV30R16- | 0.411 | 7.79E-29 |
| LINC01050  | 0.535 | 4.38E-51 |
| AL683887.1 | 0.397 | 9.99E-27 |
| LINC02104  | 0.306 | 5.24E-16 |
| CCL5       | 0.385 | 3.65E-25 |
| ARF4P1     | 0.367 | 6.88E-23 |
| ATP1B3P1   | 0.324 | 6.09E-18 |
| AC017076.1 | 0.324 | 7.47E-18 |
| AL008726.1 | 0.354 | 2.98E-21 |
| AC147067.2 | 0.325 | 5.30E-18 |
| AC011899.3 | 0.404 | 8.70E-28 |
| AC006033.2 | 0.32  | 1.82E-17 |
| AL365203.2 | 0.444 | 6.73E-34 |
| AC005046.1 | 0.384 | 4.33E-25 |

|            |       |           |
|------------|-------|-----------|
| AC108673.2 | 0.406 | 5.14E-28  |
| AC005291.2 | 0.512 | 3.66E-46  |
| AP000904.1 | 0.615 | 4.73E-71  |
| MIR6511A4  | 0.746 | 2.66E-120 |
| AC100757.1 | 0.342 | 7.92E-20  |
| BX322562.1 | 0.416 | 1.72E-29  |
| RIMBP3B    | 0.375 | 6.28E-24  |
| CCL23      | 0.349 | 1.02E-20  |
| F8A2       | 0.323 | 9.42E-18  |
| AC023043.4 | 0.329 | 2.12E-18  |
| AC009804.1 | 0.338 | 2.29E-19  |
| AC067904.3 | 0.333 | 7.55E-19  |
| LENG9      | 0.391 | 4.96E-26  |
| LINC00547  | 0.437 | 1.00E-32  |
| AC004816.2 | 0.417 | 1.23E-29  |
| RIMBP3     | 0.303 | 8.82E-16  |
| AC244153.1 | 0.307 | 4.30E-16  |
| AC243829.4 | 0.304 | 7.73E-16  |
| F8A3       | 0.301 | 1.54E-15  |
| ATP5F1AP1C | 0.36  | 6.00E-22  |
| AL357033.4 | 0.325 | 5.44E-18  |
| RF02133    | 0.369 | 4.35E-23  |
| AC087633.2 | 0.426 | 5.06E-31  |
| AC239859.6 | 0.301 | 1.54E-15  |
| TRAC       | 0.436 | 1.60E-32  |
| AC121338.2 | 0.309 | 2.28E-16  |
| AC079298.1 | 0.328 | 2.59E-18  |
| AC073130.3 | 0.526 | 4.93E-49  |
| AL118508.2 | 0.331 | 1.21E-18  |
| AC018629.1 | 0.356 | 1.57E-21  |
| AC041040.1 | 0.361 | 4.12E-22  |
| AC010894.5 | 0.343 | 5.46E-20  |
| AP003485.2 | 0.391 | 4.93E-26  |
| AC005831.1 | 0.305 | 5.65E-16  |
| LINC01101  | 0.342 | 7.04E-20  |
| LINC01943  | 0.412 | 5.94E-29  |
| LINC01173  | 0.478 | 1.00E-39  |
