# Supplementary material for: CD13 expression affects glioma patient survival and influences key functions of human glioblastoma cell lines in vitro
Source: Springer Nature journal article supplement (doi:10.1186/s12885-024-12113-z), 2024-03-22
Supplement: MOESM5 [file 26898272]

**Supplementary Table 5. CD13 correlated with collagens and MMPs**

| Gene              | r      | P         |
|-------------------|--------|-----------|
| Collagens         |        |           |
| <i>COL1A2</i>     | 0.805  | 3.83E-154 |
| <i>COL3A1</i>     | 0.794  | 3.05E-147 |
| <i>COL1A1</i>     | 0.783  | 2.47E-140 |
| <i>COL6A3</i>     | 0.781  | 7.53E-139 |
| <i>COL5A1</i>     | 0.774  | 5.26E-135 |
| <i>COL6A2</i>     | 0.769  | 4.33E-132 |
| <i>COL4A1</i>     | 0.692  | 5.63E-97  |
| <i>COL4A2</i>     | 0.69   | 2.71E-96  |
| <i>COL5A2</i>     | 0.679  | 4.58E-92  |
| <i>COL18A1</i>    | 0.674  | 4.61E-90  |
| <i>COL15A1</i>    | 0.649  | 1.80E-81  |
| <i>COL6A1</i>     | 0.639  | 2.03E-78  |
| <i>COL8A1</i>     | 0.558  | 3.29E-56  |
| <i>COL13A1</i>    | 0.522  | 3.27E-48  |
| <i>COL12A1</i>    | 0.492  | 3.31E-42  |
| <i>COL14A1</i>    | 0.409  | 2.03E-28  |
| <i>COL4A2-AS1</i> | 0.386  | 2.40E-25  |
| <i>COL10A1</i>    | 0.364  | 1.56E-22  |
| <i>COL5A3</i>     | 0.335  | 4.95E-19  |
| <i>COL8A2</i>     | 0.321  | 1.44E-17  |
| <i>COL22A1</i>    | 0.317  | 4.14E-17  |
| <i>COL11A2</i>    | -0.343 | 4.89E-20  |
| MMPs              |        |           |
| <i>MMP9</i>       | 0.708  | 3.67E-103 |
| <i>MMP11</i>      | 0.695  | 5.01E-98  |
| <i>MMP19</i>      | 0.685  | 2.43E-94  |
| <i>MMP1</i>       | 0.626  | 1.51E-74  |
| <i>MMP14</i>      | 0.569  | 5.76E-59  |
| <i>MMP7</i>       | 0.536  | 3.15E-51  |
| <i>MMP2</i>       | 0.51   | 8.83E-46  |
| <i>MMP8</i>       | 0.494  | 1.26E-42  |
| <i>MMP13</i>      | 0.48   | 5.53E-40  |
| <i>MMP25</i>      | 0.478  | 9.88E-40  |
| <i>MMP10</i>      | 0.362  | 3.05E-22  |
| <i>MMP12</i>      | 0.353  | 3.85E-21  |
| <i>MMP3</i>       | 0.337  | 2.78E-19  |

COL, Collagen; MMPs, Matrix metalloproteinases; r, correlation coefficient; P, P-value.
